# Supplementary material for: Stage-specific metabolic allocation: nutrient investment strategies during Lysiphlebia japonica Ashmead development
Source: Front Nutr. 2025 Aug 6;12:1636519. doi: 10.3389/fnut.2025.1636519 (PMC12364644; doi:10.3389/fnut.2025.1636519)
Supplement: Supplementary file 1 [file Data_Sheet_1.xlsx]

## Sheet: Sheet 1
Table S1
Correlation data between metabolites and fatty acids
node1	node2	corr	corr.p
laurate acid	(-)-Dihydrocarveol	-0.466666666666667	0.212522045855379
laurate acid	(S)-Mandelic acid	0.783333333333333	0.0172233245149912
laurate acid	1,2-Cyclohexanedione 4	-0.533333333333333	0.147525352733686
laurate acid	1,2-Didecanoylglycerol	-0.35	0.358581349206349
laurate acid	1,5-Anhydroglucitol	-0.25	0.520634920634921
laurate acid	1-Hexadecanol	-0.433333333333333	0.249917328042328
laurate acid	1-Methylhydantoin 1	-0.0666666666666667	0.880092592592593
laurate acid	1-Monopalmitin	-0.583333333333333	0.107997134038801
laurate acid	2,2-Dimethylsuccinic Acid	-0.516666666666667	0.161800044091711
laurate acid	2,4-diaminobutyric acid 2	0.716666666666667	0.0368661816578483
laurate acid	2,6-Diaminopimelic acid 1	-0.666666666666667	0.0588899911816579
laurate acid	2-amino-2-methylpropane-1,3-diol 2	0.433333333333333	0.249917328042328
laurate acid	2-Butyne-1,4-diol	-0.333333333333333	0.385322971781305
laurate acid	2-Deoxy-D-galactose 2	-0.4	0.291192680776014
laurate acid	2-deoxy-D-glucose 2	0.366666666666667	0.336259920634921
laurate acid	2-Deoxyerythritol	-0.383333333333333	0.3125
laurate acid	2'-deoxyguanosine 1	-0.45	0.229817019400353
laurate acid	2-hydroxypyridine	-0.516666666666667	0.161800044091711
laurate acid	2-ketobutyric acid 2	-0.4	0.291192680776014
laurate acid	2-Ketocaproic acid	-0.45	0.229817019400353
laurate acid	2-keto-isovaleric acid 1	0.416666666666667	0.269582231040564
laurate acid	2-Ketovaleric acid 1	-0.05	0.911618165784832
laurate acid	2-methylfumarate	-0.0666666666666667	0.880092592592593
laurate acid	3,6-Anhydro-D-galactose 4	-0.416666666666667	0.269582231040564
laurate acid	3-Aminoisobutyric acid 2	-0.516666666666667	0.161800044091711
laurate acid	3-Cyanoalanine	0.433333333333333	0.249917328042328
laurate acid	3-Hexenedioic acid	0.416666666666667	0.269582231040564
laurate acid	3-hydroxybenzoic acid	0.383333333333333	0.3125
laurate acid	3-hydroxybutyric acid	-0.583333333333333	0.107997134038801
laurate acid	3-Hydroxypropionic acid 1	-0.65	0.0665619488536155
laurate acid	3-Hydroxypyridine	0.2	0.613403880070547
laurate acid	3-hydroxypyruvate	0.616666666666667	0.0857253086419753
laurate acid	3-methylcatechol	0.616666666666667	0.0857253086419753
laurate acid	4-Acetylbutyric acid 2	0.166666666666667	0.677744708994709
laurate acid	4-aminobutyric acid 1	0.716666666666667	0.0368661816578483
laurate acid	4-Hydroxy-6-methyl-2-pyrone	-0.4	0.291192680776014
laurate acid	4-hydroxybutyrate	-0.2	0.613403880070547
laurate acid	4-Hydroxymandelic acid	-0.75	0.025490520282187
laurate acid	4-hydroxyphenylacetic acid	0.15	0.708068783068783
laurate acid	4-HYDROXYPYRIDINE	-0.05	0.911618165784832
laurate acid	4-Methylbenzyl alcohol	0.216666666666667	0.580941358024691
laurate acid	5-aminovaleric acid lactam	0.733333333333333	0.0311232363315697
laurate acid	5-Methoxytryptamine 1	-0.333333333333333	0.385322971781305
laurate acid	5'-methylthioadenosine 1	0.566666666666667	0.120574294532628
laurate acid	6-phosphogluconic acid	-0.283333333333333	0.462990520282187
laurate acid	7,8-Dimethylalloxazine	0.633333333333333	0.0760361552028219
laurate acid	adenosine	0.533333333333333	0.147525352733686
laurate acid	Adenosine 5-monophosphate	0.4	0.291192680776014
laurate acid	Adrenosterone 1	-0.233333333333333	0.551708553791887
laurate acid	alanine 1	-0.466666666666667	0.212522045855379
laurate acid	Alizarin	0.166666666666667	0.677744708994709
laurate acid	allose 1	-0.433333333333333	0.249917328042328
laurate acid	Allylmalonic acid	0.566666666666667	0.120574294532628
laurate acid	alpha-Aminoadipic acid	0.6	0.0967978395061728
laurate acid	alpha-D-glucosamine 1-phosphate	-0.733333333333333	0.0311232363315697
laurate acid	alpha-ketoglutaric acid	0.45	0.229817019400353
laurate acid	alpha-ketoisocaproic acid 1	0.85	0.00607363315696649
laurate acid	Aminomalonic acid	-0.616666666666667	0.0857253086419753
laurate acid	Aminooxyacetic acid	-0.25	0.520634920634921
laurate acid	Arachidic acid	0.483333333333333	0.193799603174603
laurate acid	asparagine 1	0.3	0.436623677248677
laurate acid	asparagine 4	0.5	0.177662037037037
laurate acid	aspartic acid 1	-0.65	0.0665619488536155
laurate acid	Atropine	-0.833333333333333	0.00826719576719577
laurate acid	Behenic acid	-0.366666666666667	0.336259920634921
laurate acid	beta-Alanine 2	-0.416666666666667	0.269582231040564
laurate acid	beta-Glutamic acid 1	0.7	0.0432539682539683
laurate acid	beta-Hydroxymyristic acid	-0.45	0.229817019400353
laurate acid	beta-Mannosylglycerate 1	-0.0833333333333333	0.843182319223986
laurate acid	Bis(2-hydroxypropyl)amine 1	0.566666666666667	0.120574294532628
laurate acid	butyraldehyde 1	-0.25	0.520634920634921
laurate acid	canavanine degr prod	-0.6	0.0967978395061728
laurate acid	carbamoyl-aspartic acid 2	0.316666666666667	0.410080467372134
laurate acid	Cerotinic acid	0.666666666666667	0.0588899911816579
laurate acid	Cholestane-3,5,6-triol, (3?5?6?-	0	1
laurate acid	cholesterol	-0.266666666666667	0.493331128747795
laurate acid	cis-gondoic acid	-0.583333333333333	0.107997134038801
laurate acid	Citraconic acid 3	-0.2	0.613403880070547
laurate acid	citrulline 1	-0.55	0.132776675485009
laurate acid	conduritol b epoxide 2	-0.633333333333333	0.0760361552028219
laurate acid	creatine degr	-0.4	0.291192680776014
laurate acid	cyclohexane-1,2-diol	0.8	0.0138282627865961
laurate acid	cycloleucine 1	0.3	0.436623677248677
laurate acid	cycloserine	-0.6	0.0967978395061728
laurate acid	Cysteinylglycine 3	0.333333333333333	0.385322971781305
laurate acid	cytidine 1	0.616666666666667	0.0857253086419753
laurate acid	cytidine-monophosphate 1	-0.2	0.613403880070547
laurate acid	D-(glycerol 1-phosphate)	-0.55	0.132776675485009
laurate acid	D-alanyl-D-alanine 2	-0.366666666666667	0.336259920634921
laurate acid	D-Arabitol	-0.4	0.291192680776014
laurate acid	d-Glucoheptose 2	-0.4	0.291192680776014
laurate acid	D-Glyceric acid	-0.583333333333333	0.107997134038801
laurate acid	Digitoxose 2	-0.716666666666667	0.0368661816578483
laurate acid	Diglycerol 1	-0.516666666666667	0.161800044091711
laurate acid	Dihydroxyacetone	-0.0166666666666667	0.981569664902998
laurate acid	Dioctyl phthalate	-0.816666666666667	0.0107694003527337
laurate acid	Dodecanol	-0.45	0.229817019400353
laurate acid	Erythrose 2	0.383333333333333	0.3125
laurate acid	Ethanolamine	-0.3	0.436623677248677
laurate acid	flavin adenine degrad product	0.716666666666667	0.0368661816578483
laurate acid	Fluorene	-0.383333333333333	0.3125
laurate acid	fructose 1	0.2	0.613403880070547
laurate acid	Fructose 2,6-biphosphate degr prod 2	-0.55	0.132776675485009
laurate acid	fumaric acid	-0.316666666666667	0.410080467372134
laurate acid	Galactinol 3	0.6	0.0967978395061728
laurate acid	Gentiobiose 1	0.533333333333333	0.147525352733686
laurate acid	Glucoheptonic acid 1	-0.7	0.0432539682539683
laurate acid	gluconic acid 1	0.766666666666667	0.0213899911816578
laurate acid	Gluconic lactone 1	-0.4	0.291192680776014
laurate acid	Glucosaminic acid	0.35	0.358581349206349
laurate acid	glucose 2	-0.4	0.291192680776014
laurate acid	Glucose-1-phosphate	-0.8	0.0138282627865961
laurate acid	glucose-6-phosphate 2	-0.816666666666667	0.0107694003527337
laurate acid	glutamic acid	-0.616666666666667	0.0857253086419753
laurate acid	glutamine 1	0.683333333333333	0.0503196649029982
laurate acid	glutaraldehyde 2	0.283333333333333	0.462990520282187
laurate acid	glutathione - H2O	0.3	0.436623677248677
laurate acid	glycerol	-0.7	0.0432539682539683
laurate acid	glycine 1	-0.533333333333333	0.147525352733686
laurate acid	glycine 2	-0.533333333333333	0.147525352733686
laurate acid	glycocyamine 3	-0.7	0.0432539682539683
laurate acid	glycolic acid	-0.4	0.291192680776014
laurate acid	Guanidinosuccinic acid 3	-0.25	0.520634920634921
laurate acid	guanine 1	-0.283333333333333	0.462990520282187
laurate acid	guanosine	0.366666666666667	0.336259920634921
laurate acid	guanosine-5'-monophosphate	-0.766666666666667	0.0213899911816578
laurate acid	heptadecanoic acid	-0.6	0.0967978395061728
laurate acid	Hesperitin 1	0.6	0.0967978395061728
laurate acid	hexadecane	0.45	0.229817019400353
laurate acid	histidine 2	-0.733333333333333	0.0311232363315697
laurate acid	Hydantoin, 5-(4-hydroxybutyl)- 2	-0.283333333333333	0.462990520282187
laurate acid	hydrocortisone	-0.3	0.436623677248677
laurate acid	hydroxylamine	-0.266666666666667	0.493331128747795
laurate acid	hydroxyurea	-0.266666666666667	0.493331128747795
laurate acid	hypoxanthine 1	0.666666666666667	0.0588899911816579
laurate acid	indole-3-acetamide 4	-0.6	0.0967978395061728
laurate acid	inosine	-0.266666666666667	0.493331128747795
laurate acid	inosine 5'-monophosphate	-0.3	0.436623677248677
laurate acid	isocitric acid 2	0.533333333333333	0.147525352733686
laurate acid	Isoleucine	-0.583333333333333	0.107997134038801
laurate acid	Isomaltose 1	-0.3	0.436623677248677
laurate acid	Lactamide 2	-0.183333333333333	0.643639770723104
laurate acid	lactic acid	-0.316666666666667	0.410080467372134
laurate acid	lactose 1	0.466666666666667	0.212522045855379
laurate acid	lactulose 1	-0.45	0.229817019400353
laurate acid	L-Allothreonine 1	0.583333333333333	0.107997134038801
laurate acid	L-cysteine	-0.55	0.132776675485009
laurate acid	L-dopa 2	-0.65	0.0665619488536155
laurate acid	leucine	-0.316666666666667	0.410080467372134
laurate acid	Leucrose 2	-0.683333333333333	0.0503196649029982
laurate acid	L-glutamic acid	-0.333333333333333	0.385322971781305
laurate acid	L-homoserine 1	-0.566666666666667	0.120574294532628
laurate acid	Lignoceric acid	0.0833333333333333	0.843182319223986
laurate acid	linoleic acid	-0.4	0.291192680776014
laurate acid	Linoleic acid methyl ester	-0.6	0.0967978395061728
laurate acid	lipoic acid	-0.333333333333333	0.385322971781305
laurate acid	L-Malic acid	-0.333333333333333	0.385322971781305
laurate acid	Loganin	-0.783333333333333	0.0172233245149912
laurate acid	L-Threose 2	-0.366666666666667	0.336259920634921
laurate acid	lysine	-0.566666666666667	0.120574294532628
laurate acid	Lyxose 1	-0.3	0.436623677248677
laurate acid	Maleamate 1	0.633333333333333	0.0760361552028219
laurate acid	Maleimide	0.433333333333333	0.249917328042328
laurate acid	malonic acid 1	-0.0333333333333333	0.948390652557319
laurate acid	maltitol	-0.4	0.291192680776014
laurate acid	maltose	-0.65	0.0665619488536155
laurate acid	maltotriose 2	0.233333333333333	0.551708553791887
laurate acid	mannose 2	-0.4	0.291192680776014
laurate acid	Melatonin 3	0.233333333333333	0.551708553791887
laurate acid	melibiose 1	0.45	0.229817019400353
laurate acid	methionine sulfoxide 2	-0.6	0.0967978395061728
laurate acid	Methoxamedrine 2	0.0666666666666667	0.880092592592593
laurate acid	Methyl Palmitoleate	-0.333333333333333	0.385322971781305
laurate acid	Methyl Phosphate	-0.0333333333333333	0.948390652557319
laurate acid	Monostearin	-0.566666666666667	0.120574294532628
laurate acid	myo-inositol	-0.816666666666667	0.0107694003527337
laurate acid	Myristic Acid	-0.6	0.0967978395061728
laurate acid	N(epsilon)-Trimethyllysine	-0.2	0.613403880070547
laurate acid	N-Acetyl-beta-D-mannosamine 4	-0.4	0.291192680776014
laurate acid	N-alpha-Acetyl-L-ornithine 3	0.65	0.0665619488536155
laurate acid	naphthalene	-0.233333333333333	0.551708553791887
laurate acid	N-cyclohexylformamide 1	-0.4	0.291192680776014
laurate acid	Neohesperidin	0.05	0.911618165784832
laurate acid	N-epsilon-Acetyl-L-lysine 2	-0.4	0.291192680776014
laurate acid	N-ethylmaleamic acid 3	0.433333333333333	0.249917328042328
laurate acid	N-formyl-L-methionine 1	0.383333333333333	0.3125
laurate acid	nicotinic acid	-0.4	0.291192680776014
laurate acid	N-Methyl-DL-alanine	0.85	0.00607363315696649
laurate acid	N-Methyl-L-glutamic acid 2	-0.45	0.229817019400353
laurate acid	N-Oleoyldopamine 1	-0.433333333333333	0.249917328042328
laurate acid	nornicotine	0.266666666666667	0.493331128747795
laurate acid	norvaline	0.05	0.911618165784832
laurate acid	O-acetylserine 1	0.333333333333333	0.385322971781305
laurate acid	Octadecanol	-0.8	0.0138282627865961
laurate acid	oleic acid	-0.633333333333333	0.0760361552028219
laurate acid	O-Phosphorylethanolamine	-0.0166666666666667	0.981569664902998
laurate acid	O-Phosphoserine 1	-0.4	0.291192680776014
laurate acid	ornithine 1	-0.6	0.0967978395061728
laurate acid	oxalic acid	-0.383333333333333	0.3125
laurate acid	oxamide	-0.75	0.025490520282187
laurate acid	oxoproline	0.533333333333333	0.147525352733686
laurate acid	palatinitol 2	-0.733333333333333	0.0311232363315697
laurate acid	palmitic acid	-0.683333333333333	0.0503196649029982
laurate acid	palmitoleic acid	-0.633333333333333	0.0760361552028219
laurate acid	pantothenic acid	-0.65	0.0665619488536155
laurate acid	p-cresol	-0.466666666666667	0.212522045855379
laurate acid	Pelargonic acid	-0.716666666666667	0.0368661816578483
laurate acid	phenylalanine 1	-0.616666666666667	0.0857253086419753
laurate acid	phenylethylamine	0.333333333333333	0.385322971781305
laurate acid	phloroglucinol	-0.4	0.291192680776014
laurate acid	phosphate	-0.15	0.708068783068783
laurate acid	Phosphoglycolic acid	-0.583333333333333	0.107997134038801
laurate acid	Phytol	-0.433333333333333	0.249917328042328
laurate acid	piperine 2	0.4	0.291192680776014
laurate acid	proline	0.433333333333333	0.249917328042328
laurate acid	prostaglandin A2 1	-0.566666666666667	0.120574294532628
laurate acid	Prostaglandin E2 2	-0.4	0.291192680776014
laurate acid	putrescine 2	-0.35	0.358581349206349
laurate acid	Pyrrole-2-Carboxylic Acid	-0.416666666666667	0.269582231040564
laurate acid	Pyruvic acid	0.533333333333333	0.147525352733686
laurate acid	quinic acid	0.266666666666667	0.493331128747795
laurate acid	raffinose	0.583333333333333	0.107997134038801
laurate acid	ribitol	-0.55	0.132776675485009
laurate acid	Ribonic acid, gamma-lactone	-0.616666666666667	0.0857253086419753
laurate acid	ribose	0.4	0.291192680776014
laurate acid	ribose-5-phosphate 2	0.583333333333333	0.107997134038801
laurate acid	Saccharic acid	-0.283333333333333	0.462990520282187
laurate acid	S-carboxymethylcysteine 2	-0.4	0.291192680776014
laurate acid	serine 1	-0.616666666666667	0.0857253086419753
laurate acid	shikimic acid	-0.75	0.025490520282187
laurate acid	Sophorose 1	0.65	0.0665619488536155
laurate acid	sorbitol	0.383333333333333	0.3125
laurate acid	sorbose 1	-0.65	0.0665619488536155
laurate acid	spermidine 1	-0.4	0.291192680776014
laurate acid	stearic acid	-0.8	0.0138282627865961
laurate acid	succinate semialdehyde 2	0.683333333333333	0.0503196649029982
laurate acid	succinic acid	-0.583333333333333	0.107997134038801
laurate acid	sucrose	-0.45	0.229817019400353
laurate acid	Sucrose-6-Phosphate	0.233333333333333	0.551708553791887
laurate acid	sulfuric acid	-0.633333333333333	0.0760361552028219
laurate acid	Tagatose 1	-0.4	0.291192680776014
laurate acid	Tartronic acid	-0.4	0.291192680776014
laurate acid	taurine	-0.616666666666667	0.0857253086419753
laurate acid	Threitol	-0.4	0.291192680776014
laurate acid	threo-beta-hyrdoxyaspartate 2	-0.716666666666667	0.0368661816578483
laurate acid	Threonic acid	-0.583333333333333	0.107997134038801
laurate acid	threonine 1	-0.55	0.132776675485009
laurate acid	thymidine 1	-0.65	0.0665619488536155
laurate acid	thymine	0.233333333333333	0.551708553791887
laurate acid	Thymol	-0.433333333333333	0.249917328042328
laurate acid	toluenesulfonic acid	0.416666666666667	0.269582231040564
laurate acid	trehalose	-0.4	0.291192680776014
laurate acid	trehalose-6-phosphate	-0.8	0.0138282627865961
laurate acid	tyrosine 1	-0.566666666666667	0.120574294532628
laurate acid	uracil	-0.466666666666667	0.212522045855379
laurate acid	uric acid	-0.4	0.291192680776014
laurate acid	uridine 2	0.416666666666667	0.269582231040564
laurate acid	Uridine monophosphate	-0.35	0.358581349206349
laurate acid	valine	-0.566666666666667	0.120574294532628
laurate acid	xanthine	-0.333333333333333	0.385322971781305
laurate acid	xanthosine	-0.383333333333333	0.3125
laurate acid	xylitol	-0.716666666666667	0.0368661816578483
laurate acid	Zymosterol 2	-0.633333333333333	0.0760361552028219
myristic acid	(-)-Dihydrocarveol	-0.383333333333333	0.3125
myristic acid	(S)-Mandelic acid	0.4	0.291192680776014
myristic acid	1,2-Cyclohexanedione 4	0.166666666666667	0.677744708994709
myristic acid	1,2-Didecanoylglycerol	0.266666666666667	0.493331128747795
myristic acid	1,5-Anhydroglucitol	0.183333333333333	0.643639770723104
myristic acid	1-Hexadecanol	0.383333333333333	0.3125
myristic acid	1-Methylhydantoin 1	-0.333333333333333	0.385322971781305
myristic acid	1-Monopalmitin	-0.333333333333333	0.385322971781305
myristic acid	2,2-Dimethylsuccinic Acid	0.333333333333333	0.385322971781305
myristic acid	2,4-diaminobutyric acid 2	0.283333333333333	0.462990520282187
myristic acid	2,6-Diaminopimelic acid 1	-0.533333333333333	0.147525352733686
myristic acid	2-amino-2-methylpropane-1,3-diol 2	0	1
myristic acid	2-Butyne-1,4-diol	0.516666666666667	0.161800044091711
myristic acid	2-Deoxy-D-galactose 2	0.233333333333333	0.551708553791887
myristic acid	2-deoxy-D-glucose 2	0.583333333333333	0.107997134038801
myristic acid	2-Deoxyerythritol	0.316666666666667	0.410080467372134
myristic acid	2'-deoxyguanosine 1	-0.0166666666666667	0.981569664902998
myristic acid	2-hydroxypyridine	0.216666666666667	0.580941358024691
myristic acid	2-ketobutyric acid 2	0.233333333333333	0.551708553791887
myristic acid	2-Ketocaproic acid	0.3	0.436623677248677
myristic acid	2-keto-isovaleric acid 1	-0.333333333333333	0.385322971781305
myristic acid	2-Ketovaleric acid 1	0.283333333333333	0.462990520282187
myristic acid	2-methylfumarate	-0.316666666666667	0.410080467372134
myristic acid	3,6-Anhydro-D-galactose 4	0.283333333333333	0.462990520282187
myristic acid	3-Aminoisobutyric acid 2	-0.2	0.613403880070547
myristic acid	3-Cyanoalanine	-0.2	0.613403880070547
myristic acid	3-Hexenedioic acid	0.116666666666667	0.775628306878307
myristic acid	3-hydroxybenzoic acid	0.2	0.613403880070547
myristic acid	3-hydroxybutyric acid	-0.333333333333333	0.385322971781305
myristic acid	3-Hydroxypropionic acid 1	-0.266666666666667	0.493331128747795
myristic acid	3-Hydroxypyridine	-0.15	0.708068783068783
myristic acid	3-hydroxypyruvate	0.366666666666667	0.336259920634921
myristic acid	3-methylcatechol	0	1
myristic acid	4-Acetylbutyric acid 2	-0.7	0.0432539682539683
myristic acid	4-aminobutyric acid 1	0.383333333333333	0.3125
myristic acid	4-Hydroxy-6-methyl-2-pyrone	0.233333333333333	0.551708553791887
myristic acid	4-hydroxybutyrate	0.166666666666667	0.677744708994709
myristic acid	4-Hydroxymandelic acid	-0.366666666666667	0.336259920634921
myristic acid	4-hydroxyphenylacetic acid	-0.15	0.708068783068783
myristic acid	4-HYDROXYPYRIDINE	0.216666666666667	0.580941358024691
myristic acid	4-Methylbenzyl alcohol	-0.266666666666667	0.493331128747795
myristic acid	5-aminovaleric acid lactam	0.266666666666667	0.493331128747795
myristic acid	5-Methoxytryptamine 1	-0.583333333333333	0.107997134038801
myristic acid	5'-methylthioadenosine 1	-0.383333333333333	0.3125
myristic acid	6-phosphogluconic acid	-0.233333333333333	0.551708553791887
myristic acid	7,8-Dimethylalloxazine	0.383333333333333	0.3125
myristic acid	adenosine	0.116666666666667	0.775628306878307
myristic acid	Adenosine 5-monophosphate	-0.216666666666667	0.580941358024691
myristic acid	Adrenosterone 1	0.483333333333333	0.193799603174603
myristic acid	alanine 1	-0.383333333333333	0.3125
myristic acid	Alizarin	-0.2	0.613403880070547
myristic acid	allose 1	0.383333333333333	0.3125
myristic acid	Allylmalonic acid	-0.3	0.436623677248677
myristic acid	alpha-Aminoadipic acid	-0.166666666666667	0.677744708994709
myristic acid	alpha-D-glucosamine 1-phosphate	-0.283333333333333	0.462990520282187
myristic acid	alpha-ketoglutaric acid	-0.233333333333333	0.551708553791887
myristic acid	alpha-ketoisocaproic acid 1	0.366666666666667	0.336259920634921
myristic acid	Aminomalonic acid	-0.35	0.358581349206349
myristic acid	Aminooxyacetic acid	0.183333333333333	0.643639770723104
myristic acid	Arachidic acid	-0.283333333333333	0.462990520282187
myristic acid	asparagine 1	-0.316666666666667	0.410080467372134
myristic acid	asparagine 4	-0.416666666666667	0.269582231040564
myristic acid	aspartic acid 1	-0.516666666666667	0.161800044091711
myristic acid	Atropine	0	1
myristic acid	Behenic acid	-0.4	0.291192680776014
myristic acid	beta-Alanine 2	0.166666666666667	0.677744708994709
myristic acid	beta-Glutamic acid 1	-0.0166666666666667	0.981569664902998
myristic acid	beta-Hydroxymyristic acid	0.183333333333333	0.643639770723104
myristic acid	beta-Mannosylglycerate 1	-0.466666666666667	0.212522045855379
myristic acid	Bis(2-hydroxypropyl)amine 1	-0.0833333333333333	0.843182319223986
myristic acid	butyraldehyde 1	0.183333333333333	0.643639770723104
myristic acid	canavanine degr prod	-0.3	0.436623677248677
myristic acid	carbamoyl-aspartic acid 2	-0.233333333333333	0.551708553791887
myristic acid	Cerotinic acid	0.216666666666667	0.580941358024691
myristic acid	Cholestane-3,5,6-triol, (3?5?6?-	0.483333333333333	0.193799603174603
myristic acid	cholesterol	0.15	0.708068783068783
myristic acid	cis-gondoic acid	-0.516666666666667	0.161800044091711
myristic acid	Citraconic acid 3	0.233333333333333	0.551708553791887
myristic acid	citrulline 1	0.35	0.358581349206349
myristic acid	conduritol b epoxide 2	-0.366666666666667	0.336259920634921
myristic acid	creatine degr	0.233333333333333	0.551708553791887
myristic acid	cyclohexane-1,2-diol	-0.0333333333333333	0.948390652557319
myristic acid	cycloleucine 1	-0.8	0.0138282627865961
myristic acid	cycloserine	-0.416666666666667	0.269582231040564
myristic acid	Cysteinylglycine 3	-0.45	0.229817019400353
myristic acid	cytidine 1	0.366666666666667	0.336259920634921
myristic acid	cytidine-monophosphate 1	0.05	0.911618165784832
myristic acid	D-(glycerol 1-phosphate)	0.3	0.436623677248677
myristic acid	D-alanyl-D-alanine 2	0.383333333333333	0.3125
myristic acid	D-Arabitol	0.233333333333333	0.551708553791887
myristic acid	d-Glucoheptose 2	0.233333333333333	0.551708553791887
myristic acid	D-Glyceric acid	-0.333333333333333	0.385322971781305
myristic acid	Digitoxose 2	-0.216666666666667	0.580941358024691
myristic acid	Diglycerol 1	-0.4	0.291192680776014
myristic acid	Dihydroxyacetone	0.35	0.358581349206349
myristic acid	Dioctyl phthalate	-0.0333333333333333	0.948390652557319
myristic acid	Dodecanol	0.3	0.436623677248677
myristic acid	Erythrose 2	0.75	0.025490520282187
myristic acid	Ethanolamine	0.333333333333333	0.385322971781305
myristic acid	flavin adenine degrad product	0.333333333333333	0.385322971781305
myristic acid	Fluorene	0.316666666666667	0.410080467372134
myristic acid	fructose 1	-0.4	0.291192680776014
myristic acid	Fructose 2,6-biphosphate degr prod 2	0.0333333333333333	0.948390652557319
myristic acid	fumaric acid	-0.133333333333333	0.743540564373898
myristic acid	Galactinol 3	-0.0666666666666667	0.880092592592593
myristic acid	Gentiobiose 1	0.0166666666666667	0.981569664902998
myristic acid	Glucoheptonic acid 1	-0.2	0.613403880070547
myristic acid	gluconic acid 1	0.316666666666667	0.410080467372134
myristic acid	Gluconic lactone 1	0.233333333333333	0.551708553791887
myristic acid	Glucosaminic acid	-0.333333333333333	0.385322971781305
myristic acid	glucose 2	0.233333333333333	0.551708553791887
myristic acid	Glucose-1-phosphate	-0.3	0.436623677248677
myristic acid	glucose-6-phosphate 2	-0.316666666666667	0.410080467372134
myristic acid	glutamic acid	-0.366666666666667	0.336259920634921
myristic acid	glutamine 1	0.366666666666667	0.336259920634921
myristic acid	glutaraldehyde 2	-0.483333333333333	0.193799603174603
myristic acid	glutathione - H2O	-0.316666666666667	0.410080467372134
myristic acid	glycerol	-0.333333333333333	0.385322971781305
myristic acid	glycine 1	-0.216666666666667	0.580941358024691
myristic acid	glycine 2	-0.283333333333333	0.462990520282187
myristic acid	glycocyamine 3	0.1	0.809981261022928
myristic acid	glycolic acid	0.233333333333333	0.551708553791887
myristic acid	Guanidinosuccinic acid 3	0.183333333333333	0.643639770723104
myristic acid	guanine 1	0.333333333333333	0.385322971781305
myristic acid	guanosine	-0.133333333333333	0.743540564373898
myristic acid	guanosine-5'-monophosphate	-0.0666666666666667	0.880092592592593
myristic acid	heptadecanoic acid	-0.416666666666667	0.269582231040564
myristic acid	Hesperitin 1	0.183333333333333	0.643639770723104
myristic acid	hexadecane	-0.416666666666667	0.269582231040564
myristic acid	histidine 2	-0.466666666666667	0.212522045855379
myristic acid	Hydantoin, 5-(4-hydroxybutyl)- 2	0.0166666666666667	0.981569664902998
myristic acid	hydrocortisone	-0.316666666666667	0.410080467372134
myristic acid	hydroxylamine	-0.333333333333333	0.385322971781305
myristic acid	hydroxyurea	0.516666666666667	0.161800044091711
myristic acid	hypoxanthine 1	0.1	0.809981261022928
myristic acid	indole-3-acetamide 4	0.0166666666666667	0.981569664902998
myristic acid	inosine	0.25	0.520634920634921
myristic acid	inosine 5'-monophosphate	0.3	0.436623677248677
myristic acid	isocitric acid 2	-0.4	0.291192680776014
myristic acid	Isoleucine	-0.333333333333333	0.385322971781305
myristic acid	Isomaltose 1	0.333333333333333	0.385322971781305
myristic acid	Lactamide 2	0.433333333333333	0.249917328042328
myristic acid	lactic acid	0.233333333333333	0.551708553791887
myristic acid	lactose 1	0.483333333333333	0.193799603174603
myristic acid	lactulose 1	-0.2	0.613403880070547
myristic acid	L-Allothreonine 1	0.25	0.520634920634921
myristic acid	L-cysteine	-0.416666666666667	0.269582231040564
myristic acid	L-dopa 2	-0.266666666666667	0.493331128747795
myristic acid	leucine	-0.683333333333333	0.0503196649029982
myristic acid	Leucrose 2	-0.433333333333333	0.249917328042328
myristic acid	L-glutamic acid	0.166666666666667	0.677744708994709
myristic acid	L-homoserine 1	-0.5	0.177662037037037
myristic acid	Lignoceric acid	-0.533333333333333	0.147525352733686
myristic acid	linoleic acid	0.233333333333333	0.551708553791887
myristic acid	Linoleic acid methyl ester	0.133333333333333	0.743540564373898
myristic acid	lipoic acid	0.166666666666667	0.677744708994709
myristic acid	L-Malic acid	-0.216666666666667	0.580941358024691
myristic acid	Loganin	-0.216666666666667	0.580941358024691
myristic acid	L-Threose 2	-0.8	0.0138282627865961
myristic acid	lysine	-0.433333333333333	0.249917328042328
myristic acid	Lyxose 1	0.333333333333333	0.385322971781305
myristic acid	Maleamate 1	0.0833333333333333	0.843182319223986
myristic acid	Maleimide	-0.2	0.613403880070547
myristic acid	malonic acid 1	-0.483333333333333	0.193799603174603
myristic acid	maltitol	0.233333333333333	0.551708553791887
myristic acid	maltose	0.05	0.911618165784832
myristic acid	maltotriose 2	-0.266666666666667	0.493331128747795
myristic acid	mannose 2	0.233333333333333	0.551708553791887
myristic acid	Melatonin 3	-0.266666666666667	0.493331128747795
myristic acid	melibiose 1	-0.316666666666667	0.410080467372134
myristic acid	methionine sulfoxide 2	-0.416666666666667	0.269582231040564
myristic acid	Methoxamedrine 2	-0.283333333333333	0.462990520282187
myristic acid	Methyl Palmitoleate	0.2	0.613403880070547
myristic acid	Methyl Phosphate	0.433333333333333	0.249917328042328
myristic acid	Monostearin	-0.25	0.520634920634921
myristic acid	myo-inositol	-0.15	0.708068783068783
myristic acid	Myristic Acid	-0.0333333333333333	0.948390652557319
myristic acid	N(epsilon)-Trimethyllysine	0.0166666666666667	0.981569664902998
myristic acid	N-Acetyl-beta-D-mannosamine 4	0.233333333333333	0.551708553791887
myristic acid	N-alpha-Acetyl-L-ornithine 3	0.233333333333333	0.551708553791887
myristic acid	naphthalene	0.416666666666667	0.269582231040564
myristic acid	N-cyclohexylformamide 1	0.233333333333333	0.551708553791887
myristic acid	Neohesperidin	0.533333333333333	0.147525352733686
myristic acid	N-epsilon-Acetyl-L-lysine 2	0.233333333333333	0.551708553791887
myristic acid	N-ethylmaleamic acid 3	-0.2	0.613403880070547
myristic acid	N-formyl-L-methionine 1	0.2	0.613403880070547
myristic acid	nicotinic acid	0.233333333333333	0.551708553791887
myristic acid	N-Methyl-DL-alanine	0.0833333333333333	0.843182319223986
myristic acid	N-Methyl-L-glutamic acid 2	0.3	0.436623677248677
myristic acid	N-Oleoyldopamine 1	0.383333333333333	0.3125
myristic acid	nornicotine	-0.4	0.291192680776014
myristic acid	norvaline	-0.0666666666666667	0.880092592592593
myristic acid	O-acetylserine 1	-0.266666666666667	0.493331128747795
myristic acid	Octadecanol	-0.3	0.436623677248677
myristic acid	oleic acid	-0.266666666666667	0.493331128747795
myristic acid	O-Phosphorylethanolamine	-0.65	0.0665619488536155
myristic acid	O-Phosphoserine 1	0.233333333333333	0.551708553791887
myristic acid	ornithine 1	-0.166666666666667	0.677744708994709
myristic acid	oxalic acid	0.316666666666667	0.410080467372134
myristic acid	oxamide	-0.4	0.291192680776014
myristic acid	oxoproline	-0.4	0.291192680776014
myristic acid	palatinitol 2	-0.0666666666666667	0.880092592592593
myristic acid	palmitic acid	-0.283333333333333	0.462990520282187
myristic acid	palmitoleic acid	-0.266666666666667	0.493331128747795
myristic acid	pantothenic acid	-0.266666666666667	0.493331128747795
myristic acid	p-cresol	0.283333333333333	0.462990520282187
myristic acid	Pelargonic acid	-0.2	0.613403880070547
myristic acid	phenylalanine 1	-0.366666666666667	0.336259920634921
myristic acid	phenylethylamine	0.283333333333333	0.462990520282187
myristic acid	phloroglucinol	0.233333333333333	0.551708553791887
myristic acid	phosphate	0.216666666666667	0.580941358024691
myristic acid	Phosphoglycolic acid	-0.333333333333333	0.385322971781305
myristic acid	Phytol	0.383333333333333	0.3125
myristic acid	piperine 2	-0.333333333333333	0.385322971781305
myristic acid	proline	-0.366666666666667	0.336259920634921
myristic acid	prostaglandin A2 1	-0.5	0.177662037037037
myristic acid	Prostaglandin E2 2	0.233333333333333	0.551708553791887
myristic acid	putrescine 2	0.166666666666667	0.677744708994709
myristic acid	Pyrrole-2-Carboxylic Acid	0.55	0.132776675485009
myristic acid	Pyruvic acid	-0.316666666666667	0.410080467372134
myristic acid	quinic acid	-0.0333333333333333	0.948390652557319
myristic acid	raffinose	0	1
myristic acid	ribitol	0.383333333333333	0.3125
myristic acid	Ribonic acid, gamma-lactone	-0.366666666666667	0.336259920634921
myristic acid	ribose	-0.233333333333333	0.551708553791887
myristic acid	ribose-5-phosphate 2	0.466666666666667	0.212522045855379
myristic acid	Saccharic acid	0.333333333333333	0.385322971781305
myristic acid	S-carboxymethylcysteine 2	0.233333333333333	0.551708553791887
myristic acid	serine 1	-0.366666666666667	0.336259920634921
myristic acid	shikimic acid	-0.366666666666667	0.336259920634921
myristic acid	Sophorose 1	0.0166666666666667	0.981569664902998
myristic acid	sorbitol	-0.316666666666667	0.410080467372134
myristic acid	sorbose 1	-0.0666666666666667	0.880092592592593
myristic acid	spermidine 1	0.233333333333333	0.551708553791887
myristic acid	stearic acid	-0.3	0.436623677248677
myristic acid	succinate semialdehyde 2	0.333333333333333	0.385322971781305
myristic acid	succinic acid	-0.333333333333333	0.385322971781305
myristic acid	sucrose	-0.0166666666666667	0.981569664902998
myristic acid	Sucrose-6-Phosphate	0.0333333333333333	0.948390652557319
myristic acid	sulfuric acid	-0.45	0.229817019400353
myristic acid	Tagatose 1	0.233333333333333	0.551708553791887
myristic acid	Tartronic acid	0.233333333333333	0.551708553791887
myristic acid	taurine	-0.566666666666667	0.120574294532628
myristic acid	Threitol	0.233333333333333	0.551708553791887
myristic acid	threo-beta-hyrdoxyaspartate 2	-0.383333333333333	0.3125
myristic acid	Threonic acid	-0.333333333333333	0.385322971781305
myristic acid	threonine 1	-0.416666666666667	0.269582231040564
myristic acid	thymidine 1	-0.266666666666667	0.493331128747795
myristic acid	thymine	-0.716666666666667	0.0368661816578483
myristic acid	Thymol	0.383333333333333	0.3125
myristic acid	toluenesulfonic acid	-0.466666666666667	0.212522045855379
myristic acid	trehalose	-0.616666666666667	0.0857253086419753
myristic acid	trehalose-6-phosphate	-0.3	0.436623677248677
myristic acid	tyrosine 1	-0.433333333333333	0.249917328042328
myristic acid	uracil	-0.4	0.291192680776014
myristic acid	uric acid	0.233333333333333	0.551708553791887
myristic acid	uridine 2	0.116666666666667	0.775628306878307
myristic acid	Uridine monophosphate	0.266666666666667	0.493331128747795
myristic acid	valine	-0.433333333333333	0.249917328042328
myristic acid	xanthine	0.3	0.436623677248677
myristic acid	xanthosine	0.25	0.520634920634921
myristic acid	xylitol	-0.216666666666667	0.580941358024691
myristic acid	Zymosterol 2	-0.266666666666667	0.493331128747795
transmyristelaudate acid	(-)-Dihydrocarveol	-0.633333333333333	0.0760361552028219
transmyristelaudate acid	(S)-Mandelic acid	0.616666666666667	0.0857253086419753
transmyristelaudate acid	1,2-Cyclohexanedione 4	-0.45	0.229817019400353
transmyristelaudate acid	1,2-Didecanoylglycerol	0.0333333333333333	0.948390652557319
transmyristelaudate acid	1,5-Anhydroglucitol	0	1
transmyristelaudate acid	1-Hexadecanol	-0.15	0.708068783068783
transmyristelaudate acid	1-Methylhydantoin 1	-0.3	0.436623677248677
transmyristelaudate acid	1-Monopalmitin	-0.65	0.0665619488536155
transmyristelaudate acid	2,2-Dimethylsuccinic Acid	-0.1	0.809981261022928
transmyristelaudate acid	2,4-diaminobutyric acid 2	0.566666666666667	0.120574294532628
transmyristelaudate acid	2,6-Diaminopimelic acid 1	-0.516666666666667	0.161800044091711
transmyristelaudate acid	2-amino-2-methylpropane-1,3-diol 2	0.816666666666667	0.0107694003527337
transmyristelaudate acid	2-Butyne-1,4-diol	-0.25	0.520634920634921
transmyristelaudate acid	2-Deoxy-D-galactose 2	0	1
transmyristelaudate acid	2-deoxy-D-glucose 2	0.583333333333333	0.107997134038801
transmyristelaudate acid	2-Deoxyerythritol	-0.1	0.809981261022928
transmyristelaudate acid	2'-deoxyguanosine 1	-0.1	0.809981261022928
transmyristelaudate acid	2-hydroxypyridine	-0.1	0.809981261022928
transmyristelaudate acid	2-ketobutyric acid 2	0	1
transmyristelaudate acid	2-Ketocaproic acid	-0.05	0.911618165784832
transmyristelaudate acid	2-keto-isovaleric acid 1	0	1
transmyristelaudate acid	2-Ketovaleric acid 1	0.433333333333333	0.249917328042328
transmyristelaudate acid	2-methylfumarate	-0.1	0.809981261022928
transmyristelaudate acid	3,6-Anhydro-D-galactose 4	-0.183333333333333	0.643639770723104
transmyristelaudate acid	3-Aminoisobutyric acid 2	-0.633333333333333	0.0760361552028219
transmyristelaudate acid	3-Cyanoalanine	0.0666666666666667	0.880092592592593
transmyristelaudate acid	3-Hexenedioic acid	0.1	0.809981261022928
transmyristelaudate acid	3-hydroxybenzoic acid	0.316666666666667	0.410080467372134
transmyristelaudate acid	3-hydroxybutyric acid	-0.65	0.0665619488536155
transmyristelaudate acid	3-Hydroxypropionic acid 1	-0.7	0.0432539682539683
transmyristelaudate acid	3-Hydroxypyridine	0.25	0.520634920634921
transmyristelaudate acid	3-hydroxypyruvate	0.716666666666667	0.0368661816578483
transmyristelaudate acid	3-methylcatechol	0.533333333333333	0.147525352733686
transmyristelaudate acid	4-Acetylbutyric acid 2	0.166666666666667	0.677744708994709
transmyristelaudate acid	4-aminobutyric acid 1	0.666666666666667	0.0588899911816579
transmyristelaudate acid	4-Hydroxy-6-methyl-2-pyrone	0	1
transmyristelaudate acid	4-hydroxybutyrate	0.0666666666666667	0.880092592592593
transmyristelaudate acid	4-Hydroxymandelic acid	-0.55	0.132776675485009
transmyristelaudate acid	4-hydroxyphenylacetic acid	0.233333333333333	0.551708553791887
transmyristelaudate acid	4-HYDROXYPYRIDINE	0.416666666666667	0.269582231040564
transmyristelaudate acid	4-Methylbenzyl alcohol	0.133333333333333	0.743540564373898
transmyristelaudate acid	5-aminovaleric acid lactam	0.8	0.0138282627865961
transmyristelaudate acid	5-Methoxytryptamine 1	-0.4	0.291192680776014
transmyristelaudate acid	5'-methylthioadenosine 1	0.466666666666667	0.212522045855379
transmyristelaudate acid	6-phosphogluconic acid	-0.35	0.358581349206349
transmyristelaudate acid	7,8-Dimethylalloxazine	0.783333333333333	0.0172233245149912
transmyristelaudate acid	adenosine	-0.0666666666666667	0.880092592592593
transmyristelaudate acid	Adenosine 5-monophosphate	0.0333333333333333	0.948390652557319
transmyristelaudate acid	Adrenosterone 1	0.15	0.708068783068783
transmyristelaudate acid	alanine 1	-0.633333333333333	0.0760361552028219
transmyristelaudate acid	Alizarin	0.0833333333333333	0.843182319223986
transmyristelaudate acid	allose 1	-0.15	0.708068783068783
transmyristelaudate acid	Allylmalonic acid	0.483333333333333	0.193799603174603
transmyristelaudate acid	alpha-Aminoadipic acid	0.283333333333333	0.462990520282187
transmyristelaudate acid	alpha-D-glucosamine 1-phosphate	-0.65	0.0665619488536155
transmyristelaudate acid	alpha-ketoglutaric acid	0.0833333333333333	0.843182319223986
transmyristelaudate acid	alpha-ketoisocaproic acid 1	0.666666666666667	0.0588899911816579
transmyristelaudate acid	Aminomalonic acid	-0.683333333333333	0.0503196649029982
transmyristelaudate acid	Aminooxyacetic acid	0	1
transmyristelaudate acid	Arachidic acid	0.4	0.291192680776014
transmyristelaudate acid	asparagine 1	0.183333333333333	0.643639770723104
transmyristelaudate acid	asparagine 4	0.116666666666667	0.775628306878307
transmyristelaudate acid	aspartic acid 1	-0.483333333333333	0.193799603174603
transmyristelaudate acid	Atropine	-0.6	0.0967978395061728
transmyristelaudate acid	Behenic acid	-0.466666666666667	0.212522045855379
transmyristelaudate acid	beta-Alanine 2	-0.233333333333333	0.551708553791887
transmyristelaudate acid	beta-Glutamic acid 1	0.133333333333333	0.743540564373898
transmyristelaudate acid	beta-Hydroxymyristic acid	-0.5	0.177662037037037
transmyristelaudate acid	beta-Mannosylglycerate 1	-0.0333333333333333	0.948390652557319
transmyristelaudate acid	Bis(2-hydroxypropyl)amine 1	0.4	0.291192680776014
transmyristelaudate acid	butyraldehyde 1	0	1
transmyristelaudate acid	canavanine degr prod	-0.55	0.132776675485009
transmyristelaudate acid	carbamoyl-aspartic acid 2	0.0833333333333333	0.843182319223986
transmyristelaudate acid	Cerotinic acid	0.466666666666667	0.212522045855379
transmyristelaudate acid	Cholestane-3,5,6-triol, (3?5?6?-	0.266666666666667	0.493331128747795
transmyristelaudate acid	cholesterol	-0.116666666666667	0.775628306878307
transmyristelaudate acid	cis-gondoic acid	-0.566666666666667	0.120574294532628
transmyristelaudate acid	Citraconic acid 3	-0.166666666666667	0.677744708994709
transmyristelaudate acid	citrulline 1	-0.45	0.229817019400353
transmyristelaudate acid	conduritol b epoxide 2	-0.716666666666667	0.0368661816578483
transmyristelaudate acid	creatine degr	0	1
transmyristelaudate acid	cyclohexane-1,2-diol	0.416666666666667	0.269582231040564
transmyristelaudate acid	cycloleucine 1	0.1	0.809981261022928
transmyristelaudate acid	cycloserine	-0.55	0.132776675485009
transmyristelaudate acid	Cysteinylglycine 3	0.216666666666667	0.580941358024691
transmyristelaudate acid	cytidine 1	0.716666666666667	0.0368661816578483
transmyristelaudate acid	cytidine-monophosphate 1	-0.2	0.613403880070547
transmyristelaudate acid	D-(glycerol 1-phosphate)	-0.65	0.0665619488536155
transmyristelaudate acid	D-alanyl-D-alanine 2	-0.233333333333333	0.551708553791887
transmyristelaudate acid	D-Arabitol	0	1
transmyristelaudate acid	d-Glucoheptose 2	0	1
transmyristelaudate acid	D-Glyceric acid	-0.65	0.0665619488536155
transmyristelaudate acid	Digitoxose 2	-0.783333333333333	0.0172233245149912
transmyristelaudate acid	Diglycerol 1	-0.283333333333333	0.462990520282187
transmyristelaudate acid	Dihydroxyacetone	0.216666666666667	0.580941358024691
transmyristelaudate acid	Dioctyl phthalate	-0.366666666666667	0.336259920634921
transmyristelaudate acid	Dodecanol	-0.05	0.911618165784832
transmyristelaudate acid	Erythrose 2	0.316666666666667	0.410080467372134
transmyristelaudate acid	Ethanolamine	-0.15	0.708068783068783
transmyristelaudate acid	flavin adenine degrad product	0.45	0.229817019400353
transmyristelaudate acid	Fluorene	-0.1	0.809981261022928
transmyristelaudate acid	fructose 1	0.216666666666667	0.580941358024691
transmyristelaudate acid	Fructose 2,6-biphosphate degr prod 2	-0.5	0.177662037037037
transmyristelaudate acid	fumaric acid	-0.316666666666667	0.410080467372134
transmyristelaudate acid	Galactinol 3	0.55	0.132776675485009
transmyristelaudate acid	Gentiobiose 1	0.6	0.0967978395061728
transmyristelaudate acid	Glucoheptonic acid 1	-0.75	0.025490520282187
transmyristelaudate acid	gluconic acid 1	0.716666666666667	0.0368661816578483
transmyristelaudate acid	Gluconic lactone 1	0	1
transmyristelaudate acid	Glucosaminic acid	-0.0166666666666667	0.981569664902998
transmyristelaudate acid	glucose 2	0	1
transmyristelaudate acid	Glucose-1-phosphate	-0.6	0.0967978395061728
transmyristelaudate acid	glucose-6-phosphate 2	-0.633333333333333	0.0760361552028219
transmyristelaudate acid	glutamic acid	-0.716666666666667	0.0368661816578483
transmyristelaudate acid	glutamine 1	0.55	0.132776675485009
transmyristelaudate acid	glutaraldehyde 2	0.1	0.809981261022928
transmyristelaudate acid	glutathione - H2O	0.183333333333333	0.643639770723104
transmyristelaudate acid	glycerol	-0.766666666666667	0.0213899911816578
transmyristelaudate acid	glycine 1	-0.65	0.0665619488536155
transmyristelaudate acid	glycine 2	-0.6	0.0967978395061728
transmyristelaudate acid	glycocyamine 3	-0.45	0.229817019400353
transmyristelaudate acid	glycolic acid	0	1
transmyristelaudate acid	Guanidinosuccinic acid 3	0	1
transmyristelaudate acid	guanine 1	-0.15	0.708068783068783
transmyristelaudate acid	guanosine	0.0166666666666667	0.981569664902998
transmyristelaudate acid	guanosine-5'-monophosphate	-0.533333333333333	0.147525352733686
transmyristelaudate acid	heptadecanoic acid	-0.55	0.132776675485009
transmyristelaudate acid	Hesperitin 1	0.7	0.0432539682539683
transmyristelaudate acid	hexadecane	0.2	0.613403880070547
transmyristelaudate acid	histidine 2	-0.566666666666667	0.120574294532628
transmyristelaudate acid	Hydantoin, 5-(4-hydroxybutyl)- 2	-0.2	0.613403880070547
transmyristelaudate acid	hydrocortisone	-0.25	0.520634920634921
transmyristelaudate acid	hydroxylamine	-0.3	0.436623677248677
transmyristelaudate acid	hydroxyurea	0	1
transmyristelaudate acid	hypoxanthine 1	0.216666666666667	0.580941358024691
transmyristelaudate acid	indole-3-acetamide 4	-0.5	0.177662037037037
transmyristelaudate acid	inosine	-0.133333333333333	0.743540564373898
transmyristelaudate acid	inosine 5'-monophosphate	-0.15	0.708068783068783
transmyristelaudate acid	isocitric acid 2	0.466666666666667	0.212522045855379
transmyristelaudate acid	Isoleucine	-0.65	0.0665619488536155
transmyristelaudate acid	Isomaltose 1	-0.15	0.708068783068783
transmyristelaudate acid	Lactamide 2	0.233333333333333	0.551708553791887
transmyristelaudate acid	lactic acid	-0.0833333333333333	0.843182319223986
transmyristelaudate acid	lactose 1	0.266666666666667	0.493331128747795
transmyristelaudate acid	lactulose 1	-0.316666666666667	0.410080467372134
transmyristelaudate acid	L-Allothreonine 1	0.333333333333333	0.385322971781305
transmyristelaudate acid	L-cysteine	-0.633333333333333	0.0760361552028219
transmyristelaudate acid	L-dopa 2	-0.7	0.0432539682539683
transmyristelaudate acid	leucine	-0.583333333333333	0.107997134038801
transmyristelaudate acid	Leucrose 2	-0.5	0.177662037037037
transmyristelaudate acid	L-glutamic acid	0.05	0.911618165784832
transmyristelaudate acid	L-homoserine 1	-0.533333333333333	0.147525352733686
transmyristelaudate acid	Lignoceric acid	0.35	0.358581349206349
transmyristelaudate acid	linoleic acid	0	1
transmyristelaudate acid	Linoleic acid methyl ester	-0.0666666666666667	0.880092592592593
transmyristelaudate acid	lipoic acid	0.05	0.911618165784832
transmyristelaudate acid	L-Malic acid	-0.216666666666667	0.580941358024691
transmyristelaudate acid	Loganin	-0.7	0.0432539682539683
transmyristelaudate acid	L-Threose 2	-0.483333333333333	0.193799603174603
transmyristelaudate acid	lysine	-0.666666666666667	0.0588899911816579
transmyristelaudate acid	Lyxose 1	-0.15	0.708068783068783
transmyristelaudate acid	Maleamate 1	0.666666666666667	0.0588899911816579
transmyristelaudate acid	Maleimide	0.466666666666667	0.212522045855379
transmyristelaudate acid	malonic acid 1	-0.3	0.436623677248677
transmyristelaudate acid	maltitol	0	1
transmyristelaudate acid	maltose	-0.666666666666667	0.0588899911816579
transmyristelaudate acid	maltotriose 2	0.133333333333333	0.743540564373898
transmyristelaudate acid	mannose 2	0	1
transmyristelaudate acid	Melatonin 3	0.1	0.809981261022928
transmyristelaudate acid	melibiose 1	0.183333333333333	0.643639770723104
transmyristelaudate acid	methionine sulfoxide 2	-0.55	0.132776675485009
transmyristelaudate acid	Methoxamedrine 2	-0.0166666666666667	0.981569664902998
transmyristelaudate acid	Methyl Palmitoleate	0.166666666666667	0.677744708994709
transmyristelaudate acid	Methyl Phosphate	0.0666666666666667	0.880092592592593
transmyristelaudate acid	Monostearin	-0.733333333333333	0.0311232363315697
transmyristelaudate acid	myo-inositol	-0.433333333333333	0.249917328042328
transmyristelaudate acid	Myristic Acid	-0.266666666666667	0.493331128747795
transmyristelaudate acid	N(epsilon)-Trimethyllysine	-0.283333333333333	0.462990520282187
transmyristelaudate acid	N-Acetyl-beta-D-mannosamine 4	0	1
transmyristelaudate acid	N-alpha-Acetyl-L-ornithine 3	0.75	0.025490520282187
transmyristelaudate acid	naphthalene	0.166666666666667	0.677744708994709
transmyristelaudate acid	N-cyclohexylformamide 1	0	1
transmyristelaudate acid	Neohesperidin	0.3	0.436623677248677
transmyristelaudate acid	N-epsilon-Acetyl-L-lysine 2	0	1
transmyristelaudate acid	N-ethylmaleamic acid 3	0.0666666666666667	0.880092592592593
transmyristelaudate acid	N-formyl-L-methionine 1	0.316666666666667	0.410080467372134
transmyristelaudate acid	nicotinic acid	0	1
transmyristelaudate acid	N-Methyl-DL-alanine	0.4	0.291192680776014
transmyristelaudate acid	N-Methyl-L-glutamic acid 2	-0.05	0.911618165784832
transmyristelaudate acid	N-Oleoyldopamine 1	-0.05	0.911618165784832
transmyristelaudate acid	nornicotine	0.133333333333333	0.743540564373898
transmyristelaudate acid	norvaline	0.0833333333333333	0.843182319223986
transmyristelaudate acid	O-acetylserine 1	0.216666666666667	0.580941358024691
transmyristelaudate acid	Octadecanol	-0.6	0.0967978395061728
transmyristelaudate acid	oleic acid	-0.7	0.0432539682539683
transmyristelaudate acid	O-Phosphorylethanolamine	0.133333333333333	0.743540564373898
transmyristelaudate acid	O-Phosphoserine 1	0	1
transmyristelaudate acid	ornithine 1	-0.75	0.025490520282187
transmyristelaudate acid	oxalic acid	-0.1	0.809981261022928
transmyristelaudate acid	oxamide	-0.55	0.132776675485009
transmyristelaudate acid	oxoproline	0.116666666666667	0.775628306878307
transmyristelaudate acid	palatinitol 2	-0.616666666666667	0.0857253086419753
transmyristelaudate acid	palmitic acid	-0.65	0.0665619488536155
transmyristelaudate acid	palmitoleic acid	-0.7	0.0432539682539683
transmyristelaudate acid	pantothenic acid	-0.7	0.0432539682539683
transmyristelaudate acid	p-cresol	-0.0833333333333333	0.843182319223986
transmyristelaudate acid	Pelargonic acid	-0.366666666666667	0.336259920634921
transmyristelaudate acid	phenylalanine 1	-0.716666666666667	0.0368661816578483
transmyristelaudate acid	phenylethylamine	0.4	0.291192680776014
transmyristelaudate acid	phloroglucinol	0	1
transmyristelaudate acid	phosphate	-0.05	0.911618165784832
transmyristelaudate acid	Phosphoglycolic acid	0.1	0.809981261022928
transmyristelaudate acid	Phytol	-0.15	0.708068783068783
transmyristelaudate acid	piperine 2	0.266666666666667	0.493331128747795
transmyristelaudate acid	proline	0.0333333333333333	0.948390652557319
transmyristelaudate acid	prostaglandin A2 1	-0.533333333333333	0.147525352733686
transmyristelaudate acid	Prostaglandin E2 2	0	1
transmyristelaudate acid	putrescine 2	-0.333333333333333	0.385322971781305
transmyristelaudate acid	Pyrrole-2-Carboxylic Acid	-0.116666666666667	0.775628306878307
transmyristelaudate acid	Pyruvic acid	0.133333333333333	0.743540564373898
transmyristelaudate acid	quinic acid	0.133333333333333	0.743540564373898
transmyristelaudate acid	raffinose	0.0166666666666667	0.981569664902998
transmyristelaudate acid	ribitol	-0.15	0.708068783068783
transmyristelaudate acid	Ribonic acid, gamma-lactone	-0.716666666666667	0.0368661816578483
transmyristelaudate acid	ribose	0	1
transmyristelaudate acid	ribose-5-phosphate 2	0.566666666666667	0.120574294532628
transmyristelaudate acid	Saccharic acid	-0.15	0.708068783068783
transmyristelaudate acid	S-carboxymethylcysteine 2	0	1
transmyristelaudate acid	serine 1	-0.716666666666667	0.0368661816578483
transmyristelaudate acid	shikimic acid	-0.55	0.132776675485009
transmyristelaudate acid	Sophorose 1	0.683333333333333	0.0503196649029982
transmyristelaudate acid	sorbitol	0.1	0.809981261022928
transmyristelaudate acid	sorbose 1	-0.35	0.358581349206349
transmyristelaudate acid	spermidine 1	0	1
transmyristelaudate acid	stearic acid	-0.6	0.0967978395061728
transmyristelaudate acid	succinate semialdehyde 2	0.766666666666667	0.0213899911816578
transmyristelaudate acid	succinic acid	-0.65	0.0665619488536155
transmyristelaudate acid	sucrose	-0.1	0.809981261022928
transmyristelaudate acid	Sucrose-6-Phosphate	0.466666666666667	0.212522045855379
transmyristelaudate acid	sulfuric acid	-0.616666666666667	0.0857253086419753
transmyristelaudate acid	Tagatose 1	0	1
transmyristelaudate acid	Tartronic acid	0	1
transmyristelaudate acid	taurine	-0.383333333333333	0.3125
transmyristelaudate acid	Threitol	0	1
transmyristelaudate acid	threo-beta-hyrdoxyaspartate 2	-0.666666666666667	0.0588899911816579
transmyristelaudate acid	Threonic acid	-0.65	0.0665619488536155
transmyristelaudate acid	threonine 1	-0.633333333333333	0.0760361552028219
transmyristelaudate acid	thymidine 1	-0.7	0.0432539682539683
transmyristelaudate acid	thymine	0.316666666666667	0.410080467372134
transmyristelaudate acid	Thymol	-0.15	0.708068783068783
transmyristelaudate acid	toluenesulfonic acid	0.166666666666667	0.677744708994709
transmyristelaudate acid	trehalose	-0.466666666666667	0.212522045855379
transmyristelaudate acid	trehalose-6-phosphate	-0.6	0.0967978395061728
transmyristelaudate acid	tyrosine 1	-0.666666666666667	0.0588899911816579
transmyristelaudate acid	uracil	-0.3	0.436623677248677
transmyristelaudate acid	uric acid	0	1
transmyristelaudate acid	uridine 2	0.1	0.809981261022928
transmyristelaudate acid	Uridine monophosphate	0.0333333333333333	0.948390652557319
transmyristelaudate acid	valine	-0.666666666666667	0.0588899911816579
transmyristelaudate acid	xanthine	-0.233333333333333	0.551708553791887
transmyristelaudate acid	xanthosine	-0.333333333333333	0.385322971781305
transmyristelaudate acid	xylitol	-0.783333333333333	0.0172233245149912
transmyristelaudate acid	Zymosterol 2	-0.7	0.0432539682539683
myristoleate acid	(-)-Dihydrocarveol	-0.8	0.0138282627865961
myristoleate acid	(S)-Mandelic acid	0.916666666666667	0.00131172839506173
myristoleate acid	1,2-Cyclohexanedione 4	-0.516666666666667	0.161800044091711
myristoleate acid	1,2-Didecanoylglycerol	0.0333333333333333	0.948390652557319
myristoleate acid	1,5-Anhydroglucitol	-0.4	0.291192680776014
myristoleate acid	1-Hexadecanol	-0.383333333333333	0.3125
myristoleate acid	1-Methylhydantoin 1	-0.166666666666667	0.677744708994709
myristoleate acid	1-Monopalmitin	-0.816666666666667	0.0107694003527337
myristoleate acid	2,2-Dimethylsuccinic Acid	-0.433333333333333	0.249917328042328
myristoleate acid	2,4-diaminobutyric acid 2	0.966666666666667	0.000165343915343915
myristoleate acid	2,6-Diaminopimelic acid 1	-0.916666666666667	0.00131172839506173
myristoleate acid	2-amino-2-methylpropane-1,3-diol 2	0.516666666666667	0.161800044091711
myristoleate acid	2-Butyne-1,4-diol	-0.2	0.613403880070547
myristoleate acid	2-Deoxy-D-galactose 2	-0.4	0.291192680776014
myristoleate acid	2-deoxy-D-glucose 2	0.45	0.229817019400353
myristoleate acid	2-Deoxyerythritol	-0.366666666666667	0.336259920634921
myristoleate acid	2'-deoxyguanosine 1	-0.5	0.177662037037037
myristoleate acid	2-hydroxypyridine	-0.533333333333333	0.147525352733686
myristoleate acid	2-ketobutyric acid 2	-0.4	0.291192680776014
myristoleate acid	2-Ketocaproic acid	-0.416666666666667	0.269582231040564
myristoleate acid	2-keto-isovaleric acid 1	0.333333333333333	0.385322971781305
myristoleate acid	2-Ketovaleric acid 1	0.5	0.177662037037037
myristoleate acid	2-methylfumarate	0.166666666666667	0.677744708994709
myristoleate acid	3,6-Anhydro-D-galactose 4	-0.383333333333333	0.3125
myristoleate acid	3-Aminoisobutyric acid 2	-0.733333333333333	0.0311232363315697
myristoleate acid	3-Cyanoalanine	0.466666666666667	0.212522045855379
myristoleate acid	3-Hexenedioic acid	0.633333333333333	0.0760361552028219
myristoleate acid	3-hydroxybenzoic acid	0.716666666666667	0.0368661816578483
myristoleate acid	3-hydroxybutyric acid	-0.816666666666667	0.0107694003527337
myristoleate acid	3-Hydroxypropionic acid 1	-0.8	0.0138282627865961
myristoleate acid	3-Hydroxypyridine	0.35	0.358581349206349
myristoleate acid	3-hydroxypyruvate	0.883333333333333	0.00307539682539683
myristoleate acid	3-methylcatechol	0.6	0.0967978395061728
myristoleate acid	4-Acetylbutyric acid 2	-0.166666666666667	0.677744708994709
myristoleate acid	4-aminobutyric acid 1	0.566666666666667	0.120574294532628
myristoleate acid	4-Hydroxy-6-methyl-2-pyrone	-0.4	0.291192680776014
myristoleate acid	4-hydroxybutyrate	0.2	0.613403880070547
myristoleate acid	4-Hydroxymandelic acid	-0.85	0.00607363315696649
myristoleate acid	4-hydroxyphenylacetic acid	0.266666666666667	0.493331128747795
myristoleate acid	4-HYDROXYPYRIDINE	0.383333333333333	0.3125
myristoleate acid	4-Methylbenzyl alcohol	0.45	0.229817019400353
myristoleate acid	5-aminovaleric acid lactam	0.55	0.132776675485009
myristoleate acid	5-Methoxytryptamine 1	-0.266666666666667	0.493331128747795
myristoleate acid	5'-methylthioadenosine 1	0.583333333333333	0.107997134038801
myristoleate acid	6-phosphogluconic acid	-0.65	0.0665619488536155
myristoleate acid	7,8-Dimethylalloxazine	0.85	0.00607363315696649
myristoleate acid	adenosine	0.683333333333333	0.0503196649029982
myristoleate acid	Adenosine 5-monophosphate	0.466666666666667	0.212522045855379
myristoleate acid	Adrenosterone 1	-0.283333333333333	0.462990520282187
myristoleate acid	alanine 1	-0.8	0.0138282627865961
myristoleate acid	Alizarin	0.433333333333333	0.249917328042328
myristoleate acid	allose 1	-0.383333333333333	0.3125
myristoleate acid	Allylmalonic acid	0.583333333333333	0.107997134038801
myristoleate acid	alpha-Aminoadipic acid	0.616666666666667	0.0857253086419753
myristoleate acid	alpha-D-glucosamine 1-phosphate	-0.816666666666667	0.0107694003527337
myristoleate acid	alpha-ketoglutaric acid	0.533333333333333	0.147525352733686
myristoleate acid	alpha-ketoisocaproic acid 1	0.933333333333333	0.000749559082892416
myristoleate acid	Aminomalonic acid	-0.816666666666667	0.0107694003527337
myristoleate acid	Aminooxyacetic acid	-0.4	0.291192680776014
myristoleate acid	Arachidic acid	0.533333333333333	0.147525352733686
myristoleate acid	asparagine 1	0.416666666666667	0.269582231040564
myristoleate acid	asparagine 4	0.516666666666667	0.161800044091711
myristoleate acid	aspartic acid 1	-0.883333333333333	0.00307539682539683
myristoleate acid	Atropine	-0.733333333333333	0.0311232363315697
myristoleate acid	Behenic acid	-0.733333333333333	0.0311232363315697
myristoleate acid	beta-Alanine 2	-0.466666666666667	0.212522045855379
myristoleate acid	beta-Glutamic acid 1	0.716666666666667	0.0368661816578483
myristoleate acid	beta-Hydroxymyristic acid	-0.5	0.177662037037037
myristoleate acid	beta-Mannosylglycerate 1	0.2	0.613403880070547
myristoleate acid	Bis(2-hydroxypropyl)amine 1	0.15	0.708068783068783
myristoleate acid	butyraldehyde 1	-0.4	0.291192680776014
myristoleate acid	canavanine degr prod	-0.75	0.025490520282187
myristoleate acid	carbamoyl-aspartic acid 2	0.45	0.229817019400353
myristoleate acid	Cerotinic acid	0.833333333333333	0.00826719576719577
myristoleate acid	Cholestane-3,5,6-triol, (3?5?6?-	0.266666666666667	0.493331128747795
myristoleate acid	cholesterol	-0.383333333333333	0.3125
myristoleate acid	cis-gondoic acid	-0.9	0.00202821869488536
myristoleate acid	Citraconic acid 3	-0.266666666666667	0.493331128747795
myristoleate acid	citrulline 1	-0.516666666666667	0.161800044091711
myristoleate acid	conduritol b epoxide 2	-0.85	0.00607363315696649
myristoleate acid	creatine degr	-0.4	0.291192680776014
myristoleate acid	cyclohexane-1,2-diol	0.716666666666667	0.0368661816578483
myristoleate acid	cycloleucine 1	0.0333333333333333	0.948390652557319
myristoleate acid	cycloserine	-0.85	0.00607363315696649
myristoleate acid	Cysteinylglycine 3	0.483333333333333	0.193799603174603
myristoleate acid	cytidine 1	0.883333333333333	0.00307539682539683
myristoleate acid	cytidine-monophosphate 1	-0.433333333333333	0.249917328042328
myristoleate acid	D-(glycerol 1-phosphate)	-0.55	0.132776675485009
myristoleate acid	D-alanyl-D-alanine 2	-0.4	0.291192680776014
myristoleate acid	D-Arabitol	-0.4	0.291192680776014
myristoleate acid	d-Glucoheptose 2	-0.4	0.291192680776014
myristoleate acid	D-Glyceric acid	-0.816666666666667	0.0107694003527337
myristoleate acid	Digitoxose 2	-0.85	0.00607363315696649
myristoleate acid	Diglycerol 1	-0.716666666666667	0.0368661816578483
myristoleate acid	Dihydroxyacetone	-0.0333333333333333	0.948390652557319
myristoleate acid	Dioctyl phthalate	-0.733333333333333	0.0311232363315697
myristoleate acid	Dodecanol	-0.416666666666667	0.269582231040564
myristoleate acid	Erythrose 2	0.666666666666667	0.0588899911816579
myristoleate acid	Ethanolamine	-0.35	0.358581349206349
myristoleate acid	flavin adenine degrad product	0.883333333333333	0.00307539682539683
myristoleate acid	Fluorene	-0.366666666666667	0.336259920634921
myristoleate acid	fructose 1	0.316666666666667	0.410080467372134
myristoleate acid	Fructose 2,6-biphosphate degr prod 2	-0.6	0.0967978395061728
myristoleate acid	fumaric acid	-0.616666666666667	0.0857253086419753
myristoleate acid	Galactinol 3	0.65	0.0665619488536155
myristoleate acid	Gentiobiose 1	0.833333333333333	0.00826719576719577
myristoleate acid	Glucoheptonic acid 1	-0.816666666666667	0.0107694003527337
myristoleate acid	gluconic acid 1	0.883333333333333	0.00307539682539683
myristoleate acid	Gluconic lactone 1	-0.4	0.291192680776014
myristoleate acid	Glucosaminic acid	0.483333333333333	0.193799603174603
myristoleate acid	glucose 2	-0.4	0.291192680776014
myristoleate acid	Glucose-1-phosphate	-0.866666666666667	0.00450837742504409
myristoleate acid	glucose-6-phosphate 2	-0.9	0.00202821869488536
myristoleate acid	glutamic acid	-0.883333333333333	0.00307539682539683
myristoleate acid	glutamine 1	0.983333333333333	4.96031746031746e-05
myristoleate acid	glutaraldehyde 2	0.183333333333333	0.643639770723104
myristoleate acid	glutathione - H2O	0.416666666666667	0.269582231040564
myristoleate acid	glycerol	-0.866666666666667	0.00450837742504409
myristoleate acid	glycine 1	-0.816666666666667	0.0107694003527337
myristoleate acid	glycine 2	-0.816666666666667	0.0107694003527337
myristoleate acid	glycocyamine 3	-0.583333333333333	0.107997134038801
myristoleate acid	glycolic acid	-0.4	0.291192680776014
myristoleate acid	Guanidinosuccinic acid 3	-0.4	0.291192680776014
myristoleate acid	guanine 1	-0.383333333333333	0.3125
myristoleate acid	guanosine	0.483333333333333	0.193799603174603
myristoleate acid	guanosine-5'-monophosphate	-0.8	0.0138282627865961
myristoleate acid	heptadecanoic acid	-0.85	0.00607363315696649
myristoleate acid	Hesperitin 1	0.833333333333333	0.00826719576719577
myristoleate acid	hexadecane	0.5	0.177662037037037
myristoleate acid	histidine 2	-0.9	0.00202821869488536
myristoleate acid	Hydantoin, 5-(4-hydroxybutyl)- 2	-0.466666666666667	0.212522045855379
myristoleate acid	hydrocortisone	-0.683333333333333	0.0503196649029982
myristoleate acid	hydroxylamine	-0.716666666666667	0.0368661816578483
myristoleate acid	hydroxyurea	-0.316666666666667	0.410080467372134
myristoleate acid	hypoxanthine 1	0.766666666666667	0.0213899911816578
myristoleate acid	indole-3-acetamide 4	-0.666666666666667	0.0588899911816579
myristoleate acid	inosine	-0.366666666666667	0.336259920634921
myristoleate acid	inosine 5'-monophosphate	-0.383333333333333	0.3125
myristoleate acid	isocitric acid 2	0.633333333333333	0.0760361552028219
myristoleate acid	Isoleucine	-0.816666666666667	0.0107694003527337
myristoleate acid	Isomaltose 1	-0.35	0.358581349206349
myristoleate acid	Lactamide 2	-0.05	0.911618165784832
myristoleate acid	lactic acid	-0.45	0.229817019400353
myristoleate acid	lactose 1	0.766666666666667	0.0213899911816578
myristoleate acid	lactulose 1	-0.75	0.025490520282187
myristoleate acid	L-Allothreonine 1	0.8	0.0138282627865961
myristoleate acid	L-cysteine	-0.833333333333333	0.00826719576719577
myristoleate acid	L-dopa 2	-0.8	0.0138282627865961
myristoleate acid	leucine	-0.616666666666667	0.0857253086419753
myristoleate acid	Leucrose 2	-0.866666666666667	0.00450837742504409
myristoleate acid	L-glutamic acid	-0.416666666666667	0.269582231040564
myristoleate acid	L-homoserine 1	-0.866666666666667	0.00450837742504409
myristoleate acid	Lignoceric acid	0.3	0.436623677248677
myristoleate acid	linoleic acid	-0.4	0.291192680776014
myristoleate acid	Linoleic acid methyl ester	-0.533333333333333	0.147525352733686
myristoleate acid	lipoic acid	-0.416666666666667	0.269582231040564
myristoleate acid	L-Malic acid	-0.65	0.0665619488536155
myristoleate acid	Loganin	-0.833333333333333	0.00826719576719577
myristoleate acid	L-Threose 2	-0.516666666666667	0.161800044091711
myristoleate acid	lysine	-0.866666666666667	0.00450837742504409
myristoleate acid	Lyxose 1	-0.35	0.358581349206349
myristoleate acid	Maleamate 1	0.8	0.0138282627865961
myristoleate acid	Maleimide	0.466666666666667	0.212522045855379
myristoleate acid	malonic acid 1	0.133333333333333	0.743540564373898
myristoleate acid	maltitol	-0.4	0.291192680776014
myristoleate acid	maltose	-0.666666666666667	0.0588899911816579
myristoleate acid	maltotriose 2	0.416666666666667	0.269582231040564
myristoleate acid	mannose 2	-0.4	0.291192680776014
myristoleate acid	Melatonin 3	0.366666666666667	0.336259920634921
myristoleate acid	melibiose 1	0.466666666666667	0.212522045855379
myristoleate acid	methionine sulfoxide 2	-0.85	0.00607363315696649
myristoleate acid	Methoxamedrine 2	-0.383333333333333	0.3125
myristoleate acid	Methyl Palmitoleate	-0.2	0.613403880070547
myristoleate acid	Methyl Phosphate	-0.266666666666667	0.493331128747795
myristoleate acid	Monostearin	-0.833333333333333	0.00826719576719577
myristoleate acid	myo-inositol	-0.766666666666667	0.0213899911816578
myristoleate acid	Myristic Acid	-0.666666666666667	0.0588899911816579
myristoleate acid	N(epsilon)-Trimethyllysine	-0.516666666666667	0.161800044091711
myristoleate acid	N-Acetyl-beta-D-mannosamine 4	-0.4	0.291192680776014
myristoleate acid	N-alpha-Acetyl-L-ornithine 3	0.95	0.000352733686067019
myristoleate acid	naphthalene	-0.0666666666666667	0.880092592592593
myristoleate acid	N-cyclohexylformamide 1	-0.4	0.291192680776014
myristoleate acid	Neohesperidin	0.35	0.358581349206349
myristoleate acid	N-epsilon-Acetyl-L-lysine 2	-0.4	0.291192680776014
myristoleate acid	N-ethylmaleamic acid 3	0.466666666666667	0.212522045855379
myristoleate acid	N-formyl-L-methionine 1	0.716666666666667	0.0368661816578483
myristoleate acid	nicotinic acid	-0.4	0.291192680776014
myristoleate acid	N-Methyl-DL-alanine	0.766666666666667	0.0213899911816578
myristoleate acid	N-Methyl-L-glutamic acid 2	-0.416666666666667	0.269582231040564
myristoleate acid	N-Oleoyldopamine 1	-0.283333333333333	0.462990520282187
myristoleate acid	nornicotine	0.433333333333333	0.249917328042328
myristoleate acid	norvaline	0.483333333333333	0.193799603174603
myristoleate acid	O-acetylserine 1	0.45	0.229817019400353
myristoleate acid	Octadecanol	-0.866666666666667	0.00450837742504409
myristoleate acid	oleic acid	-0.833333333333333	0.00826719576719577
myristoleate acid	O-Phosphorylethanolamine	-0.4	0.291192680776014
myristoleate acid	O-Phosphoserine 1	-0.4	0.291192680776014
myristoleate acid	ornithine 1	-0.816666666666667	0.0107694003527337
myristoleate acid	oxalic acid	-0.366666666666667	0.336259920634921
myristoleate acid	oxamide	-0.883333333333333	0.00307539682539683
myristoleate acid	oxoproline	0.466666666666667	0.212522045855379
myristoleate acid	palatinitol 2	-0.75	0.025490520282187
myristoleate acid	palmitic acid	-0.916666666666667	0.00131172839506173
myristoleate acid	palmitoleic acid	-0.833333333333333	0.00826719576719577
myristoleate acid	pantothenic acid	-0.8	0.0138282627865961
myristoleate acid	p-cresol	-0.45	0.229817019400353
myristoleate acid	Pelargonic acid	-0.733333333333333	0.0311232363315697
myristoleate acid	phenylalanine 1	-0.883333333333333	0.00307539682539683
myristoleate acid	phenylethylamine	0.316666666666667	0.410080467372134
myristoleate acid	phloroglucinol	-0.4	0.291192680776014
myristoleate acid	phosphate	-0.4	0.291192680776014
myristoleate acid	Phosphoglycolic acid	-0.6	0.0967978395061728
myristoleate acid	Phytol	-0.383333333333333	0.3125
myristoleate acid	piperine 2	0.433333333333333	0.249917328042328
myristoleate acid	proline	0.466666666666667	0.212522045855379
myristoleate acid	prostaglandin A2 1	-0.866666666666667	0.00450837742504409
myristoleate acid	Prostaglandin E2 2	-0.4	0.291192680776014
myristoleate acid	putrescine 2	-0.433333333333333	0.249917328042328
myristoleate acid	Pyrrole-2-Carboxylic Acid	-0.383333333333333	0.3125
myristoleate acid	Pyruvic acid	0.466666666666667	0.212522045855379
myristoleate acid	quinic acid	0.533333333333333	0.147525352733686
myristoleate acid	raffinose	0.683333333333333	0.0503196649029982
myristoleate acid	ribitol	-0.5	0.177662037037037
myristoleate acid	Ribonic acid, gamma-lactone	-0.883333333333333	0.00307539682539683
myristoleate acid	ribose	0.4	0.291192680776014
myristoleate acid	ribose-5-phosphate 2	0.3	0.436623677248677
myristoleate acid	Saccharic acid	-0.383333333333333	0.3125
myristoleate acid	S-carboxymethylcysteine 2	-0.4	0.291192680776014
myristoleate acid	serine 1	-0.883333333333333	0.00307539682539683
myristoleate acid	shikimic acid	-0.85	0.00607363315696649
myristoleate acid	Sophorose 1	0.833333333333333	0.00826719576719577
myristoleate acid	sorbitol	0.366666666666667	0.336259920634921
myristoleate acid	sorbose 1	-0.65	0.0665619488536155
myristoleate acid	spermidine 1	-0.4	0.291192680776014
myristoleate acid	stearic acid	-0.866666666666667	0.00450837742504409
myristoleate acid	succinate semialdehyde 2	0.9	0.00202821869488536
myristoleate acid	succinic acid	-0.816666666666667	0.0107694003527337
myristoleate acid	sucrose	-0.5	0.177662037037037
myristoleate acid	Sucrose-6-Phosphate	0.6	0.0967978395061728
myristoleate acid	sulfuric acid	-0.916666666666667	0.00131172839506173
myristoleate acid	Tagatose 1	-0.4	0.291192680776014
myristoleate acid	Tartronic acid	-0.4	0.291192680776014
myristoleate acid	taurine	-0.516666666666667	0.161800044091711
myristoleate acid	Threitol	-0.4	0.291192680776014
myristoleate acid	threo-beta-hyrdoxyaspartate 2	-0.866666666666667	0.00450837742504409
myristoleate acid	Threonic acid	-0.816666666666667	0.0107694003527337
myristoleate acid	threonine 1	-0.833333333333333	0.00826719576719577
myristoleate acid	thymidine 1	-0.8	0.0138282627865961
myristoleate acid	thymine	0.0833333333333333	0.843182319223986
myristoleate acid	Thymol	-0.383333333333333	0.3125
myristoleate acid	toluenesulfonic acid	0.466666666666667	0.212522045855379
myristoleate acid	trehalose	-0.483333333333333	0.193799603174603
myristoleate acid	trehalose-6-phosphate	-0.866666666666667	0.00450837742504409
myristoleate acid	tyrosine 1	-0.866666666666667	0.00450837742504409
myristoleate acid	uracil	-0.766666666666667	0.0213899911816578
myristoleate acid	uric acid	-0.4	0.291192680776014
myristoleate acid	uridine 2	0.633333333333333	0.0760361552028219
myristoleate acid	Uridine monophosphate	0.0333333333333333	0.948390652557319
myristoleate acid	valine	-0.866666666666667	0.00450837742504409
myristoleate acid	xanthine	-0.366666666666667	0.336259920634921
myristoleate acid	xanthosine	-0.466666666666667	0.212522045855379
myristoleate acid	xylitol	-0.85	0.00607363315696649
myristoleate acid	Zymosterol 2	-0.833333333333333	0.00826719576719577
pentadecanoate acid	(-)-Dihydrocarveol	-0.7	0.0432539682539683
pentadecanoate acid	(S)-Mandelic acid	0.85	0.00607363315696649
pentadecanoate acid	1,2-Cyclohexanedione 4	-0.733333333333333	0.0311232363315697
pentadecanoate acid	1,2-Didecanoylglycerol	-0.183333333333333	0.643639770723104
pentadecanoate acid	1,5-Anhydroglucitol	-0.433333333333333	0.249917328042328
pentadecanoate acid	1-Hexadecanol	-0.6	0.0967978395061728
pentadecanoate acid	1-Methylhydantoin 1	-0.183333333333333	0.643639770723104
pentadecanoate acid	1-Monopalmitin	-0.716666666666667	0.0368661816578483
pentadecanoate acid	2,2-Dimethylsuccinic Acid	-0.6	0.0967978395061728
pentadecanoate acid	2,4-diaminobutyric acid 2	0.816666666666667	0.0107694003527337
pentadecanoate acid	2,6-Diaminopimelic acid 1	-0.733333333333333	0.0311232363315697
pentadecanoate acid	2-amino-2-methylpropane-1,3-diol 2	0.733333333333333	0.0311232363315697
pentadecanoate acid	2-Butyne-1,4-diol	-0.333333333333333	0.385322971781305
pentadecanoate acid	2-Deoxy-D-galactose 2	-0.5	0.177662037037037
pentadecanoate acid	2-deoxy-D-glucose 2	0.316666666666667	0.410080467372134
pentadecanoate acid	2-Deoxyerythritol	-0.533333333333333	0.147525352733686
pentadecanoate acid	2'-deoxyguanosine 1	-0.466666666666667	0.212522045855379
pentadecanoate acid	2-hydroxypyridine	-0.533333333333333	0.147525352733686
pentadecanoate acid	2-ketobutyric acid 2	-0.5	0.177662037037037
pentadecanoate acid	2-Ketocaproic acid	-0.566666666666667	0.120574294532628
pentadecanoate acid	2-keto-isovaleric acid 1	0.466666666666667	0.212522045855379
pentadecanoate acid	2-Ketovaleric acid 1	0.333333333333333	0.385322971781305
pentadecanoate acid	2-methylfumarate	0.3	0.436623677248677
pentadecanoate acid	3,6-Anhydro-D-galactose 4	-0.55	0.132776675485009
pentadecanoate acid	3-Aminoisobutyric acid 2	-0.683333333333333	0.0503196649029982
pentadecanoate acid	3-Cyanoalanine	0.6	0.0967978395061728
pentadecanoate acid	3-Hexenedioic acid	0.6	0.0967978395061728
pentadecanoate acid	3-hydroxybenzoic acid	0.616666666666667	0.0857253086419753
pentadecanoate acid	3-hydroxybutyric acid	-0.716666666666667	0.0368661816578483
pentadecanoate acid	3-Hydroxypropionic acid 1	-0.766666666666667	0.0213899911816578
pentadecanoate acid	3-Hydroxypyridine	0.266666666666667	0.493331128747795
pentadecanoate acid	3-hydroxypyruvate	0.816666666666667	0.0107694003527337
pentadecanoate acid	3-methylcatechol	0.816666666666667	0.0107694003527337
pentadecanoate acid	4-Acetylbutyric acid 2	0.116666666666667	0.775628306878307
pentadecanoate acid	4-aminobutyric acid 1	0.6	0.0967978395061728
pentadecanoate acid	4-Hydroxy-6-methyl-2-pyrone	-0.5	0.177662037037037
pentadecanoate acid	4-hydroxybutyrate	-0.0166666666666667	0.981569664902998
pentadecanoate acid	4-Hydroxymandelic acid	-0.75	0.025490520282187
pentadecanoate acid	4-hydroxyphenylacetic acid	0.383333333333333	0.3125
pentadecanoate acid	4-HYDROXYPYRIDINE	0.15	0.708068783068783
pentadecanoate acid	4-Methylbenzyl alcohol	0.55	0.132776675485009
pentadecanoate acid	5-aminovaleric acid lactam	0.616666666666667	0.0857253086419753
pentadecanoate acid	5-Methoxytryptamine 1	-0.15	0.708068783068783
pentadecanoate acid	5'-methylthioadenosine 1	0.75	0.025490520282187
pentadecanoate acid	6-phosphogluconic acid	-0.583333333333333	0.107997134038801
pentadecanoate acid	7,8-Dimethylalloxazine	0.783333333333333	0.0172233245149912
pentadecanoate acid	adenosine	0.466666666666667	0.212522045855379
pentadecanoate acid	Adenosine 5-monophosphate	0.566666666666667	0.120574294532628
pentadecanoate acid	Adrenosterone 1	-0.316666666666667	0.410080467372134
pentadecanoate acid	alanine 1	-0.7	0.0432539682539683
pentadecanoate acid	Alizarin	0.483333333333333	0.193799603174603
pentadecanoate acid	allose 1	-0.6	0.0967978395061728
pentadecanoate acid	Allylmalonic acid	0.783333333333333	0.0172233245149912
pentadecanoate acid	alpha-Aminoadipic acid	0.733333333333333	0.0311232363315697
pentadecanoate acid	alpha-D-glucosamine 1-phosphate	-0.783333333333333	0.0172233245149912
pentadecanoate acid	alpha-ketoglutaric acid	0.6	0.0967978395061728
pentadecanoate acid	alpha-ketoisocaproic acid 1	0.883333333333333	0.00307539682539683
pentadecanoate acid	Aminomalonic acid	-0.75	0.025490520282187
pentadecanoate acid	Aminooxyacetic acid	-0.433333333333333	0.249917328042328
pentadecanoate acid	Arachidic acid	0.7	0.0432539682539683
pentadecanoate acid	asparagine 1	0.583333333333333	0.107997134038801
pentadecanoate acid	asparagine 4	0.65	0.0665619488536155
pentadecanoate acid	aspartic acid 1	-0.683333333333333	0.0503196649029982
pentadecanoate acid	Atropine	-0.866666666666667	0.00450837742504409
pentadecanoate acid	Behenic acid	-0.566666666666667	0.120574294532628
pentadecanoate acid	beta-Alanine 2	-0.633333333333333	0.0760361552028219
pentadecanoate acid	beta-Glutamic acid 1	0.683333333333333	0.0503196649029982
pentadecanoate acid	beta-Hydroxymyristic acid	-0.716666666666667	0.0368661816578483
pentadecanoate acid	beta-Mannosylglycerate 1	0.15	0.708068783068783
pentadecanoate acid	Bis(2-hydroxypropyl)amine 1	0.466666666666667	0.212522045855379
pentadecanoate acid	butyraldehyde 1	-0.433333333333333	0.249917328042328
pentadecanoate acid	canavanine degr prod	-0.733333333333333	0.0311232363315697
pentadecanoate acid	carbamoyl-aspartic acid 2	0.55	0.132776675485009
pentadecanoate acid	Cerotinic acid	0.833333333333333	0.00826719576719577
pentadecanoate acid	Cholestane-3,5,6-triol, (3?5?6?-	-0.0666666666666667	0.880092592592593
pentadecanoate acid	cholesterol	-0.383333333333333	0.3125
pentadecanoate acid	cis-gondoic acid	-0.716666666666667	0.0368661816578483
pentadecanoate acid	Citraconic acid 3	-0.383333333333333	0.3125
pentadecanoate acid	citrulline 1	-0.75	0.025490520282187
pentadecanoate acid	conduritol b epoxide 2	-0.8	0.0138282627865961
pentadecanoate acid	creatine degr	-0.5	0.177662037037037
pentadecanoate acid	cyclohexane-1,2-diol	0.866666666666667	0.00450837742504409
pentadecanoate acid	cycloleucine 1	0.4	0.291192680776014
pentadecanoate acid	cycloserine	-0.683333333333333	0.0503196649029982
pentadecanoate acid	Cysteinylglycine 3	0.616666666666667	0.0857253086419753
pentadecanoate acid	cytidine 1	0.816666666666667	0.0107694003527337
pentadecanoate acid	cytidine-monophosphate 1	-0.433333333333333	0.249917328042328
pentadecanoate acid	D-(glycerol 1-phosphate)	-0.833333333333333	0.00826719576719577
pentadecanoate acid	D-alanyl-D-alanine 2	-0.633333333333333	0.0760361552028219
pentadecanoate acid	D-Arabitol	-0.5	0.177662037037037
pentadecanoate acid	d-Glucoheptose 2	-0.5	0.177662037037037
pentadecanoate acid	D-Glyceric acid	-0.716666666666667	0.0368661816578483
pentadecanoate acid	Digitoxose 2	-0.883333333333333	0.00307539682539683
pentadecanoate acid	Diglycerol 1	-0.566666666666667	0.120574294532628
pentadecanoate acid	Dihydroxyacetone	-0.2	0.613403880070547
pentadecanoate acid	Dioctyl phthalate	-0.833333333333333	0.00826719576719577
pentadecanoate acid	Dodecanol	-0.566666666666667	0.120574294532628
pentadecanoate acid	Erythrose 2	0.35	0.358581349206349
pentadecanoate acid	Ethanolamine	-0.516666666666667	0.161800044091711
pentadecanoate acid	flavin adenine degrad product	0.816666666666667	0.0107694003527337
pentadecanoate acid	Fluorene	-0.533333333333333	0.147525352733686
pentadecanoate acid	fructose 1	0.383333333333333	0.3125
pentadecanoate acid	Fructose 2,6-biphosphate degr prod 2	-0.65	0.0665619488536155
pentadecanoate acid	fumaric acid	-0.616666666666667	0.0857253086419753
pentadecanoate acid	Galactinol 3	0.7	0.0432539682539683
pentadecanoate acid	Gentiobiose 1	0.85	0.00607363315696649
pentadecanoate acid	Glucoheptonic acid 1	-0.833333333333333	0.00826719576719577
pentadecanoate acid	gluconic acid 1	0.883333333333333	0.00307539682539683
pentadecanoate acid	Gluconic lactone 1	-0.5	0.177662037037037
pentadecanoate acid	Glucosaminic acid	0.516666666666667	0.161800044091711
pentadecanoate acid	glucose 2	-0.5	0.177662037037037
pentadecanoate acid	Glucose-1-phosphate	-0.816666666666667	0.0107694003527337
pentadecanoate acid	glucose-6-phosphate 2	-0.866666666666667	0.00450837742504409
pentadecanoate acid	glutamic acid	-0.816666666666667	0.0107694003527337
pentadecanoate acid	glutamine 1	0.8	0.0138282627865961
pentadecanoate acid	glutaraldehyde 2	0.383333333333333	0.3125
pentadecanoate acid	glutathione - H2O	0.583333333333333	0.107997134038801
pentadecanoate acid	glycerol	-0.833333333333333	0.00826719576719577
pentadecanoate acid	glycine 1	-0.816666666666667	0.0107694003527337
pentadecanoate acid	glycine 2	-0.633333333333333	0.0760361552028219
pentadecanoate acid	glycocyamine 3	-0.733333333333333	0.0311232363315697
pentadecanoate acid	glycolic acid	-0.5	0.177662037037037
pentadecanoate acid	Guanidinosuccinic acid 3	-0.433333333333333	0.249917328042328
pentadecanoate acid	guanine 1	-0.533333333333333	0.147525352733686
pentadecanoate acid	guanosine	0.55	0.132776675485009
pentadecanoate acid	guanosine-5'-monophosphate	-0.9	0.00202821869488536
pentadecanoate acid	heptadecanoic acid	-0.683333333333333	0.0503196649029982
pentadecanoate acid	Hesperitin 1	0.85	0.00607363315696649
pentadecanoate acid	hexadecane	0.666666666666667	0.0588899911816579
pentadecanoate acid	histidine 2	-0.783333333333333	0.0172233245149912
pentadecanoate acid	Hydantoin, 5-(4-hydroxybutyl)- 2	-0.433333333333333	0.249917328042328
pentadecanoate acid	hydrocortisone	-0.55	0.132776675485009
pentadecanoate acid	hydroxylamine	-0.416666666666667	0.269582231040564
pentadecanoate acid	hydroxyurea	-0.433333333333333	0.249917328042328
pentadecanoate acid	hypoxanthine 1	0.633333333333333	0.0760361552028219
pentadecanoate acid	indole-3-acetamide 4	-0.833333333333333	0.00826719576719577
pentadecanoate acid	inosine	-0.5	0.177662037037037
pentadecanoate acid	inosine 5'-monophosphate	-0.5	0.177662037037037
pentadecanoate acid	isocitric acid 2	0.783333333333333	0.0172233245149912
pentadecanoate acid	Isoleucine	-0.716666666666667	0.0368661816578483
pentadecanoate acid	Isomaltose 1	-0.516666666666667	0.161800044091711
pentadecanoate acid	Lactamide 2	-0.2	0.613403880070547
pentadecanoate acid	lactic acid	-0.55	0.132776675485009
pentadecanoate acid	lactose 1	0.566666666666667	0.120574294532628
pentadecanoate acid	lactulose 1	-0.65	0.0665619488536155
pentadecanoate acid	L-Allothreonine 1	0.75	0.025490520282187
pentadecanoate acid	L-cysteine	-0.7	0.0432539682539683
pentadecanoate acid	L-dopa 2	-0.766666666666667	0.0213899911816578
pentadecanoate acid	leucine	-0.45	0.229817019400353
pentadecanoate acid	Leucrose 2	-0.7	0.0432539682539683
pentadecanoate acid	L-glutamic acid	-0.45	0.229817019400353
pentadecanoate acid	L-homoserine 1	-0.666666666666667	0.0588899911816579
pentadecanoate acid	Lignoceric acid	0.433333333333333	0.249917328042328
pentadecanoate acid	linoleic acid	-0.5	0.177662037037037
pentadecanoate acid	Linoleic acid methyl ester	-0.6	0.0967978395061728
pentadecanoate acid	lipoic acid	-0.45	0.229817019400353
pentadecanoate acid	L-Malic acid	-0.583333333333333	0.107997134038801
pentadecanoate acid	Loganin	-0.85	0.00607363315696649
pentadecanoate acid	L-Threose 2	-0.3	0.436623677248677
pentadecanoate acid	lysine	-0.75	0.025490520282187
pentadecanoate acid	Lyxose 1	-0.516666666666667	0.161800044091711
pentadecanoate acid	Maleamate 1	0.883333333333333	0.00307539682539683
pentadecanoate acid	Maleimide	0.666666666666667	0.0588899911816579
pentadecanoate acid	malonic acid 1	0.1	0.809981261022928
pentadecanoate acid	maltitol	-0.5	0.177662037037037
pentadecanoate acid	maltose	-0.783333333333333	0.0172233245149912
pentadecanoate acid	maltotriose 2	0.533333333333333	0.147525352733686
pentadecanoate acid	mannose 2	-0.5	0.177662037037037
pentadecanoate acid	Melatonin 3	0.466666666666667	0.212522045855379
pentadecanoate acid	melibiose 1	0.616666666666667	0.0857253086419753
pentadecanoate acid	methionine sulfoxide 2	-0.683333333333333	0.0503196649029982
pentadecanoate acid	Methoxamedrine 2	-0.2	0.613403880070547
pentadecanoate acid	Methyl Palmitoleate	-0.35	0.358581349206349
pentadecanoate acid	Methyl Phosphate	-0.266666666666667	0.493331128747795
pentadecanoate acid	Monostearin	-0.833333333333333	0.00826719576719577
pentadecanoate acid	myo-inositol	-0.833333333333333	0.00826719576719577
pentadecanoate acid	Myristic Acid	-0.633333333333333	0.0760361552028219
pentadecanoate acid	N(epsilon)-Trimethyllysine	-0.483333333333333	0.193799603174603
pentadecanoate acid	N-Acetyl-beta-D-mannosamine 4	-0.5	0.177662037037037
pentadecanoate acid	N-alpha-Acetyl-L-ornithine 3	0.85	0.00607363315696649
pentadecanoate acid	naphthalene	-0.3	0.436623677248677
pentadecanoate acid	N-cyclohexylformamide 1	-0.5	0.177662037037037
pentadecanoate acid	Neohesperidin	0.25	0.520634920634921
pentadecanoate acid	N-epsilon-Acetyl-L-lysine 2	-0.5	0.177662037037037
pentadecanoate acid	N-ethylmaleamic acid 3	0.6	0.0967978395061728
pentadecanoate acid	N-formyl-L-methionine 1	0.616666666666667	0.0857253086419753
pentadecanoate acid	nicotinic acid	-0.5	0.177662037037037
pentadecanoate acid	N-Methyl-DL-alanine	0.85	0.00607363315696649
pentadecanoate acid	N-Methyl-L-glutamic acid 2	-0.566666666666667	0.120574294532628
pentadecanoate acid	N-Oleoyldopamine 1	-0.55	0.132776675485009
pentadecanoate acid	nornicotine	0.5	0.177662037037037
pentadecanoate acid	norvaline	0.283333333333333	0.462990520282187
pentadecanoate acid	O-acetylserine 1	0.6	0.0967978395061728
pentadecanoate acid	Octadecanol	-0.816666666666667	0.0107694003527337
pentadecanoate acid	oleic acid	-0.783333333333333	0.0172233245149912
pentadecanoate acid	O-Phosphorylethanolamine	-0.0666666666666667	0.880092592592593
pentadecanoate acid	O-Phosphoserine 1	-0.5	0.177662037037037
pentadecanoate acid	ornithine 1	-0.85	0.00607363315696649
pentadecanoate acid	oxalic acid	-0.533333333333333	0.147525352733686
pentadecanoate acid	oxamide	-0.733333333333333	0.0311232363315697
pentadecanoate acid	oxoproline	0.616666666666667	0.0857253086419753
pentadecanoate acid	palatinitol 2	-0.9	0.00202821869488536
pentadecanoate acid	palmitic acid	-0.816666666666667	0.0107694003527337
pentadecanoate acid	palmitoleic acid	-0.783333333333333	0.0172233245149912
pentadecanoate acid	pantothenic acid	-0.766666666666667	0.0213899911816578
pentadecanoate acid	p-cresol	-0.616666666666667	0.0857253086419753
pentadecanoate acid	Pelargonic acid	-0.666666666666667	0.0588899911816579
pentadecanoate acid	phenylalanine 1	-0.816666666666667	0.0107694003527337
pentadecanoate acid	phenylethylamine	0.283333333333333	0.462990520282187
pentadecanoate acid	phloroglucinol	-0.5	0.177662037037037
pentadecanoate acid	phosphate	-0.433333333333333	0.249917328042328
pentadecanoate acid	Phosphoglycolic acid	-0.333333333333333	0.385322971781305
pentadecanoate acid	Phytol	-0.6	0.0967978395061728
pentadecanoate acid	piperine 2	0.65	0.0665619488536155
pentadecanoate acid	proline	0.533333333333333	0.147525352733686
pentadecanoate acid	prostaglandin A2 1	-0.666666666666667	0.0588899911816579
pentadecanoate acid	Prostaglandin E2 2	-0.5	0.177662037037037
pentadecanoate acid	putrescine 2	-0.583333333333333	0.107997134038801
pentadecanoate acid	Pyrrole-2-Carboxylic Acid	-0.483333333333333	0.193799603174603
pentadecanoate acid	Pyruvic acid	0.65	0.0665619488536155
pentadecanoate acid	quinic acid	0.55	0.132776675485009
pentadecanoate acid	raffinose	0.55	0.132776675485009
pentadecanoate acid	ribitol	-0.666666666666667	0.0588899911816579
pentadecanoate acid	Ribonic acid, gamma-lactone	-0.816666666666667	0.0107694003527337
pentadecanoate acid	ribose	0.5	0.177662037037037
pentadecanoate acid	ribose-5-phosphate 2	0.366666666666667	0.336259920634921
pentadecanoate acid	Saccharic acid	-0.533333333333333	0.147525352733686
pentadecanoate acid	S-carboxymethylcysteine 2	-0.5	0.177662037037037
pentadecanoate acid	serine 1	-0.816666666666667	0.0107694003527337
pentadecanoate acid	shikimic acid	-0.75	0.025490520282187
pentadecanoate acid	Sophorose 1	0.9	0.00202821869488536
pentadecanoate acid	sorbitol	0.533333333333333	0.147525352733686
pentadecanoate acid	sorbose 1	-0.633333333333333	0.0760361552028219
pentadecanoate acid	spermidine 1	-0.5	0.177662037037037
pentadecanoate acid	stearic acid	-0.816666666666667	0.0107694003527337
pentadecanoate acid	succinate semialdehyde 2	0.85	0.00607363315696649
pentadecanoate acid	succinic acid	-0.716666666666667	0.0368661816578483
pentadecanoate acid	sucrose	-0.466666666666667	0.212522045855379
pentadecanoate acid	Sucrose-6-Phosphate	0.4	0.291192680776014
pentadecanoate acid	sulfuric acid	-0.783333333333333	0.0172233245149912
pentadecanoate acid	Tagatose 1	-0.5	0.177662037037037
pentadecanoate acid	Tartronic acid	-0.5	0.177662037037037
pentadecanoate acid	taurine	-0.4	0.291192680776014
pentadecanoate acid	Threitol	-0.5	0.177662037037037
pentadecanoate acid	threo-beta-hyrdoxyaspartate 2	-0.816666666666667	0.0107694003527337
pentadecanoate acid	Threonic acid	-0.716666666666667	0.0368661816578483
pentadecanoate acid	threonine 1	-0.7	0.0432539682539683
pentadecanoate acid	thymidine 1	-0.766666666666667	0.0213899911816578
pentadecanoate acid	thymine	0.35	0.358581349206349
pentadecanoate acid	Thymol	-0.6	0.0967978395061728
pentadecanoate acid	toluenesulfonic acid	0.65	0.0665619488536155
pentadecanoate acid	trehalose	-0.216666666666667	0.580941358024691
pentadecanoate acid	trehalose-6-phosphate	-0.816666666666667	0.0107694003527337
pentadecanoate acid	tyrosine 1	-0.75	0.025490520282187
pentadecanoate acid	uracil	-0.533333333333333	0.147525352733686
pentadecanoate acid	uric acid	-0.5	0.177662037037037
pentadecanoate acid	uridine 2	0.6	0.0967978395061728
pentadecanoate acid	Uridine monophosphate	-0.183333333333333	0.643639770723104
pentadecanoate acid	valine	-0.75	0.025490520282187
pentadecanoate acid	xanthine	-0.533333333333333	0.147525352733686
pentadecanoate acid	xanthosine	-0.683333333333333	0.0503196649029982
pentadecanoate acid	xylitol	-0.883333333333333	0.00307539682539683
pentadecanoate acid	Zymosterol 2	-0.783333333333333	0.0172233245149912
palmitic acid	(-)-Dihydrocarveol	0.6	0.0967978395061728
palmitic acid	(S)-Mandelic acid	-0.566666666666667	0.120574294532628
palmitic acid	1,2-Cyclohexanedione 4	0.166666666666667	0.677744708994709
palmitic acid	1,2-Didecanoylglycerol	-0.583333333333333	0.107997134038801
palmitic acid	1,5-Anhydroglucitol	-0.266666666666667	0.493331128747795
palmitic acid	1-Hexadecanol	-0.216666666666667	0.580941358024691
palmitic acid	1-Methylhydantoin 1	0.616666666666667	0.0857253086419753
palmitic acid	1-Monopalmitin	0.6	0.0967978395061728
palmitic acid	2,2-Dimethylsuccinic Acid	-0.333333333333333	0.385322971781305
palmitic acid	2,4-diaminobutyric acid 2	-0.516666666666667	0.161800044091711
palmitic acid	2,6-Diaminopimelic acid 1	0.533333333333333	0.147525352733686
palmitic acid	2-amino-2-methylpropane-1,3-diol 2	-0.65	0.0665619488536155
palmitic acid	2-Butyne-1,4-diol	-0.05	0.911618165784832
palmitic acid	2-Deoxy-D-galactose 2	-0.3	0.436623677248677
palmitic acid	2-deoxy-D-glucose 2	-0.9	0.00202821869488536
palmitic acid	2-Deoxyerythritol	-0.233333333333333	0.551708553791887
palmitic acid	2'-deoxyguanosine 1	-0.0833333333333333	0.843182319223986
palmitic acid	2-hydroxypyridine	-0.233333333333333	0.551708553791887
palmitic acid	2-ketobutyric acid 2	-0.3	0.436623677248677
palmitic acid	2-Ketocaproic acid	-0.283333333333333	0.462990520282187
palmitic acid	2-keto-isovaleric acid 1	0.45	0.229817019400353
palmitic acid	2-Ketovaleric acid 1	-0.516666666666667	0.161800044091711
palmitic acid	2-methylfumarate	0.216666666666667	0.580941358024691
palmitic acid	3,6-Anhydro-D-galactose 4	-0.133333333333333	0.743540564373898
palmitic acid	3-Aminoisobutyric acid 2	0.533333333333333	0.147525352733686
palmitic acid	3-Cyanoalanine	0.233333333333333	0.551708553791887
palmitic acid	3-Hexenedioic acid	0.0666666666666667	0.880092592592593
palmitic acid	3-hydroxybenzoic acid	-0.116666666666667	0.775628306878307
palmitic acid	3-hydroxybutyric acid	0.6	0.0967978395061728
palmitic acid	3-Hydroxypropionic acid 1	0.616666666666667	0.0857253086419753
palmitic acid	3-Hydroxypyridine	-0.0833333333333333	0.843182319223986
palmitic acid	3-hydroxypyruvate	-0.666666666666667	0.0588899911816579
palmitic acid	3-methylcatechol	-0.333333333333333	0.385322971781305
palmitic acid	4-Acetylbutyric acid 2	0.283333333333333	0.462990520282187
palmitic acid	4-aminobutyric acid 1	-0.75	0.025490520282187
palmitic acid	4-Hydroxy-6-methyl-2-pyrone	-0.3	0.436623677248677
palmitic acid	4-hydroxybutyrate	-0.333333333333333	0.385322971781305
palmitic acid	4-Hydroxymandelic acid	0.5	0.177662037037037
palmitic acid	4-hydroxyphenylacetic acid	-0.166666666666667	0.677744708994709
palmitic acid	4-HYDROXYPYRIDINE	-0.683333333333333	0.0503196649029982
palmitic acid	4-Methylbenzyl alcohol	0.116666666666667	0.775628306878307
palmitic acid	5-aminovaleric acid lactam	-0.616666666666667	0.0857253086419753
palmitic acid	5-Methoxytryptamine 1	0.516666666666667	0.161800044091711
palmitic acid	5'-methylthioadenosine 1	0	1
palmitic acid	6-phosphogluconic acid	0.25	0.520634920634921
palmitic acid	7,8-Dimethylalloxazine	-0.633333333333333	0.0760361552028219
palmitic acid	adenosine	0.233333333333333	0.551708553791887
palmitic acid	Adenosine 5-monophosphate	0.266666666666667	0.493331128747795
palmitic acid	Adrenosterone 1	-0.516666666666667	0.161800044091711
palmitic acid	alanine 1	0.6	0.0967978395061728
palmitic acid	Alizarin	0.133333333333333	0.743540564373898
palmitic acid	allose 1	-0.216666666666667	0.580941358024691
palmitic acid	Allylmalonic acid	-0.0666666666666667	0.880092592592593
palmitic acid	alpha-Aminoadipic acid	0	1
palmitic acid	alpha-D-glucosamine 1-phosphate	0.566666666666667	0.120574294532628
palmitic acid	alpha-ketoglutaric acid	0.333333333333333	0.385322971781305
palmitic acid	alpha-ketoisocaproic acid 1	-0.516666666666667	0.161800044091711
palmitic acid	Aminomalonic acid	0.633333333333333	0.0760361552028219
palmitic acid	Aminooxyacetic acid	-0.266666666666667	0.493331128747795
palmitic acid	Arachidic acid	-0.0833333333333333	0.843182319223986
palmitic acid	asparagine 1	0.15	0.708068783068783
palmitic acid	asparagine 4	0.316666666666667	0.410080467372134
palmitic acid	aspartic acid 1	0.5	0.177662037037037
palmitic acid	Atropine	0.383333333333333	0.3125
palmitic acid	Behenic acid	0.45	0.229817019400353
palmitic acid	beta-Alanine 2	-0.05	0.911618165784832
palmitic acid	beta-Glutamic acid 1	0.2	0.613403880070547
palmitic acid	beta-Hydroxymyristic acid	0.216666666666667	0.580941358024691
palmitic acid	beta-Mannosylglycerate 1	0.266666666666667	0.493331128747795
palmitic acid	Bis(2-hydroxypropyl)amine 1	-0.25	0.520634920634921
palmitic acid	butyraldehyde 1	-0.266666666666667	0.493331128747795
palmitic acid	canavanine degr prod	0.466666666666667	0.212522045855379
palmitic acid	carbamoyl-aspartic acid 2	0.216666666666667	0.580941358024691
palmitic acid	Cerotinic acid	-0.333333333333333	0.385322971781305
palmitic acid	Cholestane-3,5,6-triol, (3?5?6?-	-0.566666666666667	0.120574294532628
palmitic acid	cholesterol	-0.233333333333333	0.551708553791887
palmitic acid	cis-gondoic acid	0.583333333333333	0.107997134038801
palmitic acid	Citraconic acid 3	-0.05	0.911618165784832
palmitic acid	citrulline 1	0.1	0.809981261022928
palmitic acid	conduritol b epoxide 2	0.666666666666667	0.0588899911816579
palmitic acid	creatine degr	-0.3	0.436623677248677
palmitic acid	cyclohexane-1,2-diol	-0.0833333333333333	0.843182319223986
palmitic acid	cycloleucine 1	0.35	0.358581349206349
palmitic acid	cycloserine	0.533333333333333	0.147525352733686
palmitic acid	Cysteinylglycine 3	0.216666666666667	0.580941358024691
palmitic acid	cytidine 1	-0.666666666666667	0.0588899911816579
palmitic acid	cytidine-monophosphate 1	0	1
palmitic acid	D-(glycerol 1-phosphate)	0.316666666666667	0.410080467372134
palmitic acid	D-alanyl-D-alanine 2	-0.133333333333333	0.743540564373898
palmitic acid	D-Arabitol	-0.3	0.436623677248677
palmitic acid	d-Glucoheptose 2	-0.3	0.436623677248677
palmitic acid	D-Glyceric acid	0.6	0.0967978395061728
palmitic acid	Digitoxose 2	0.666666666666667	0.0588899911816579
palmitic acid	Diglycerol 1	0.25	0.520634920634921
palmitic acid	Dihydroxyacetone	-0.316666666666667	0.410080467372134
palmitic acid	Dioctyl phthalate	0.15	0.708068783068783
palmitic acid	Dodecanol	-0.283333333333333	0.462990520282187
palmitic acid	Erythrose 2	-0.716666666666667	0.0368661816578483
palmitic acid	Ethanolamine	-0.183333333333333	0.643639770723104
palmitic acid	flavin adenine degrad product	-0.366666666666667	0.336259920634921
palmitic acid	Fluorene	-0.233333333333333	0.551708553791887
palmitic acid	fructose 1	-0.1	0.809981261022928
palmitic acid	Fructose 2,6-biphosphate degr prod 2	0.3	0.436623677248677
palmitic acid	fumaric acid	0.166666666666667	0.677744708994709
palmitic acid	Galactinol 3	-0.25	0.520634920634921
palmitic acid	Gentiobiose 1	-0.433333333333333	0.249917328042328
palmitic acid	Glucoheptonic acid 1	0.633333333333333	0.0760361552028219
palmitic acid	gluconic acid 1	-0.633333333333333	0.0760361552028219
palmitic acid	Gluconic lactone 1	-0.3	0.436623677248677
palmitic acid	Glucosaminic acid	0.316666666666667	0.410080467372134
palmitic acid	glucose 2	-0.3	0.436623677248677
palmitic acid	Glucose-1-phosphate	0.516666666666667	0.161800044091711
palmitic acid	glucose-6-phosphate 2	0.55	0.132776675485009
palmitic acid	glutamic acid	0.666666666666667	0.0588899911816579
palmitic acid	glutamine 1	-0.533333333333333	0.147525352733686
palmitic acid	glutaraldehyde 2	0.45	0.229817019400353
palmitic acid	glutathione - H2O	0.15	0.708068783068783
palmitic acid	glycerol	0.616666666666667	0.0857253086419753
palmitic acid	glycine 1	0.533333333333333	0.147525352733686
palmitic acid	glycine 2	0.666666666666667	0.0588899911816579
palmitic acid	glycocyamine 3	0.2	0.613403880070547
palmitic acid	glycolic acid	-0.3	0.436623677248677
palmitic acid	Guanidinosuccinic acid 3	-0.266666666666667	0.493331128747795
palmitic acid	guanine 1	-0.183333333333333	0.643639770723104
palmitic acid	guanosine	0.25	0.520634920634921
palmitic acid	guanosine-5'-monophosphate	0.333333333333333	0.385322971781305
palmitic acid	heptadecanoic acid	0.533333333333333	0.147525352733686
palmitic acid	Hesperitin 1	-0.483333333333333	0.193799603174603
palmitic acid	hexadecane	0.233333333333333	0.551708553791887
palmitic acid	histidine 2	0.55	0.132776675485009
palmitic acid	Hydantoin, 5-(4-hydroxybutyl)- 2	0.0166666666666667	0.981569664902998
palmitic acid	hydrocortisone	0.183333333333333	0.643639770723104
palmitic acid	hydroxylamine	0.283333333333333	0.462990520282187
palmitic acid	hydroxyurea	-0.333333333333333	0.385322971781305
palmitic acid	hypoxanthine 1	0.05	0.911618165784832
palmitic acid	indole-3-acetamide 4	0.266666666666667	0.493331128747795
palmitic acid	inosine	-0.166666666666667	0.677744708994709
palmitic acid	inosine 5'-monophosphate	-0.25	0.520634920634921
palmitic acid	isocitric acid 2	-0.05	0.911618165784832
palmitic acid	Isoleucine	0.6	0.0967978395061728
palmitic acid	Isomaltose 1	-0.183333333333333	0.643639770723104
palmitic acid	Lactamide 2	-0.533333333333333	0.147525352733686
palmitic acid	lactic acid	-0.216666666666667	0.580941358024691
palmitic acid	lactose 1	-0.266666666666667	0.493331128747795
palmitic acid	lactulose 1	0.2	0.613403880070547
palmitic acid	L-Allothreonine 1	-0.216666666666667	0.580941358024691
palmitic acid	L-cysteine	0.616666666666667	0.0857253086419753
palmitic acid	L-dopa 2	0.616666666666667	0.0857253086419753
palmitic acid	leucine	0.833333333333333	0.00826719576719577
palmitic acid	Leucrose 2	0.483333333333333	0.193799603174603
palmitic acid	L-glutamic acid	-0.316666666666667	0.410080467372134
palmitic acid	L-homoserine 1	0.55	0.132776675485009
palmitic acid	Lignoceric acid	-0.0666666666666667	0.880092592592593
palmitic acid	linoleic acid	-0.3	0.436623677248677
palmitic acid	Linoleic acid methyl ester	-0.2	0.613403880070547
palmitic acid	lipoic acid	-0.316666666666667	0.410080467372134
palmitic acid	L-Malic acid	0.1	0.809981261022928
palmitic acid	Loganin	0.583333333333333	0.107997134038801
palmitic acid	L-Threose 2	0.733333333333333	0.0311232363315697
palmitic acid	lysine	0.65	0.0665619488536155
palmitic acid	Lyxose 1	-0.183333333333333	0.643639770723104
palmitic acid	Maleamate 1	-0.4	0.291192680776014
palmitic acid	Maleimide	-0.183333333333333	0.643639770723104
palmitic acid	malonic acid 1	0.383333333333333	0.3125
palmitic acid	maltitol	-0.3	0.436623677248677
palmitic acid	maltose	0.45	0.229817019400353
palmitic acid	maltotriose 2	0.116666666666667	0.775628306878307
palmitic acid	mannose 2	-0.3	0.436623677248677
palmitic acid	Melatonin 3	0.2	0.613403880070547
palmitic acid	melibiose 1	0.266666666666667	0.493331128747795
palmitic acid	methionine sulfoxide 2	0.533333333333333	0.147525352733686
palmitic acid	Methoxamedrine 2	0.0833333333333333	0.843182319223986
palmitic acid	Methyl Palmitoleate	-0.283333333333333	0.462990520282187
palmitic acid	Methyl Phosphate	-0.4	0.291192680776014
palmitic acid	Monostearin	0.633333333333333	0.0760361552028219
palmitic acid	myo-inositol	0.266666666666667	0.493331128747795
palmitic acid	Myristic Acid	0.0833333333333333	0.843182319223986
palmitic acid	N(epsilon)-Trimethyllysine	0.1	0.809981261022928
palmitic acid	N-Acetyl-beta-D-mannosamine 4	-0.3	0.436623677248677
palmitic acid	N-alpha-Acetyl-L-ornithine 3	-0.6	0.0967978395061728
palmitic acid	naphthalene	-0.45	0.229817019400353
palmitic acid	N-cyclohexylformamide 1	-0.3	0.436623677248677
palmitic acid	Neohesperidin	-0.75	0.025490520282187
palmitic acid	N-epsilon-Acetyl-L-lysine 2	-0.3	0.436623677248677
palmitic acid	N-ethylmaleamic acid 3	0.233333333333333	0.551708553791887
palmitic acid	N-formyl-L-methionine 1	-0.116666666666667	0.775628306878307
palmitic acid	nicotinic acid	-0.3	0.436623677248677
palmitic acid	N-Methyl-DL-alanine	-0.116666666666667	0.775628306878307
palmitic acid	N-Methyl-L-glutamic acid 2	-0.283333333333333	0.462990520282187
palmitic acid	N-Oleoyldopamine 1	-0.383333333333333	0.3125
palmitic acid	nornicotine	0.266666666666667	0.493331128747795
palmitic acid	norvaline	-0.116666666666667	0.775628306878307
palmitic acid	O-acetylserine 1	0.183333333333333	0.643639770723104
palmitic acid	Octadecanol	0.516666666666667	0.161800044091711
palmitic acid	oleic acid	0.616666666666667	0.0857253086419753
palmitic acid	O-Phosphorylethanolamine	0.2	0.613403880070547
palmitic acid	O-Phosphoserine 1	-0.3	0.436623677248677
palmitic acid	ornithine 1	0.616666666666667	0.0857253086419753
palmitic acid	oxalic acid	-0.233333333333333	0.551708553791887
palmitic acid	oxamide	0.433333333333333	0.249917328042328
palmitic acid	oxoproline	0.366666666666667	0.336259920634921
palmitic acid	palatinitol 2	0.416666666666667	0.269582231040564
palmitic acid	palmitic acid	0.6	0.0967978395061728
palmitic acid	palmitoleic acid	0.616666666666667	0.0857253086419753
palmitic acid	pantothenic acid	0.616666666666667	0.0857253086419753
palmitic acid	p-cresol	-0.25	0.520634920634921
palmitic acid	Pelargonic acid	0.25	0.520634920634921
palmitic acid	phenylalanine 1	0.666666666666667	0.0588899911816579
palmitic acid	phenylethylamine	-0.0666666666666667	0.880092592592593
palmitic acid	phloroglucinol	-0.3	0.436623677248677
palmitic acid	phosphate	-0.166666666666667	0.677744708994709
palmitic acid	Phosphoglycolic acid	-0.2	0.613403880070547
palmitic acid	Phytol	-0.216666666666667	0.580941358024691
palmitic acid	piperine 2	0.166666666666667	0.677744708994709
palmitic acid	proline	0.366666666666667	0.336259920634921
palmitic acid	prostaglandin A2 1	0.55	0.132776675485009
palmitic acid	Prostaglandin E2 2	-0.3	0.436623677248677
palmitic acid	putrescine 2	0.0666666666666667	0.880092592592593
palmitic acid	Pyrrole-2-Carboxylic Acid	-0.133333333333333	0.743540564373898
palmitic acid	Pyruvic acid	0.3	0.436623677248677
palmitic acid	quinic acid	0.0833333333333333	0.843182319223986
palmitic acid	raffinose	0.233333333333333	0.551708553791887
palmitic acid	ribitol	-0.333333333333333	0.385322971781305
palmitic acid	Ribonic acid, gamma-lactone	0.666666666666667	0.0588899911816579
palmitic acid	ribose	0.3	0.436623677248677
palmitic acid	ribose-5-phosphate 2	-0.433333333333333	0.249917328042328
palmitic acid	Saccharic acid	-0.183333333333333	0.643639770723104
palmitic acid	S-carboxymethylcysteine 2	-0.3	0.436623677248677
palmitic acid	serine 1	0.666666666666667	0.0588899911816579
palmitic acid	shikimic acid	0.5	0.177662037037037
palmitic acid	Sophorose 1	-0.366666666666667	0.336259920634921
palmitic acid	sorbitol	0.233333333333333	0.551708553791887
palmitic acid	sorbose 1	0.183333333333333	0.643639770723104
palmitic acid	spermidine 1	-0.3	0.436623677248677
palmitic acid	stearic acid	0.516666666666667	0.161800044091711
palmitic acid	succinate semialdehyde 2	-0.616666666666667	0.0857253086419753
palmitic acid	succinic acid	0.6	0.0967978395061728
palmitic acid	sucrose	-0.0833333333333333	0.843182319223986
palmitic acid	Sucrose-6-Phosphate	-0.466666666666667	0.212522045855379
palmitic acid	sulfuric acid	0.6	0.0967978395061728
palmitic acid	Tagatose 1	-0.3	0.436623677248677
palmitic acid	Tartronic acid	-0.3	0.436623677248677
palmitic acid	taurine	0.55	0.132776675485009
palmitic acid	Threitol	-0.3	0.436623677248677
palmitic acid	threo-beta-hyrdoxyaspartate 2	0.616666666666667	0.0857253086419753
palmitic acid	Threonic acid	0.6	0.0967978395061728
palmitic acid	threonine 1	0.616666666666667	0.0857253086419753
palmitic acid	thymidine 1	0.616666666666667	0.0857253086419753
palmitic acid	thymine	0.0666666666666667	0.880092592592593
palmitic acid	Thymol	-0.216666666666667	0.580941358024691
palmitic acid	toluenesulfonic acid	0.2	0.613403880070547
palmitic acid	trehalose	0.7	0.0432539682539683
palmitic acid	trehalose-6-phosphate	0.516666666666667	0.161800044091711
palmitic acid	tyrosine 1	0.65	0.0665619488536155
palmitic acid	uracil	0.283333333333333	0.462990520282187
palmitic acid	uric acid	-0.3	0.436623677248677
palmitic acid	uridine 2	0.0666666666666667	0.880092592592593
palmitic acid	Uridine monophosphate	-0.583333333333333	0.107997134038801
palmitic acid	valine	0.65	0.0665619488536155
palmitic acid	xanthine	-0.0833333333333333	0.843182319223986
palmitic acid	xanthosine	0.0166666666666667	0.981569664902998
palmitic acid	xylitol	0.666666666666667	0.0588899911816579
palmitic acid	Zymosterol 2	0.616666666666667	0.0857253086419753
7-palmitoleic acid	(-)-Dihydrocarveol	-0.45	0.229817019400353
7-palmitoleic acid	(S)-Mandelic acid	0.366666666666667	0.336259920634921
7-palmitoleic acid	1,2-Cyclohexanedione 4	-0.8	0.0138282627865961
7-palmitoleic acid	1,2-Didecanoylglycerol	-0.65	0.0665619488536155
7-palmitoleic acid	1,5-Anhydroglucitol	-0.783333333333333	0.0172233245149912
7-palmitoleic acid	1-Hexadecanol	-0.816666666666667	0.0107694003527337
7-palmitoleic acid	1-Methylhydantoin 1	0.166666666666667	0.677744708994709
7-palmitoleic acid	1-Monopalmitin	-0.3	0.436623677248677
7-palmitoleic acid	2,2-Dimethylsuccinic Acid	-0.85	0.00607363315696649
7-palmitoleic acid	2,4-diaminobutyric acid 2	0.266666666666667	0.493331128747795
7-palmitoleic acid	2,6-Diaminopimelic acid 1	-0.366666666666667	0.336259920634921
7-palmitoleic acid	2-amino-2-methylpropane-1,3-diol 2	0.383333333333333	0.3125
7-palmitoleic acid	2-Butyne-1,4-diol	-0.35	0.358581349206349
7-palmitoleic acid	2-Deoxy-D-galactose 2	-0.833333333333333	0.00826719576719577
7-palmitoleic acid	2-deoxy-D-glucose 2	-0.5	0.177662037037037
7-palmitoleic acid	2-Deoxyerythritol	-0.85	0.00607363315696649
7-palmitoleic acid	2'-deoxyguanosine 1	-0.683333333333333	0.0503196649029982
7-palmitoleic acid	2-hydroxypyridine	-0.783333333333333	0.0172233245149912
7-palmitoleic acid	2-ketobutyric acid 2	-0.833333333333333	0.00826719576719577
7-palmitoleic acid	2-Ketocaproic acid	-0.8	0.0138282627865961
7-palmitoleic acid	2-keto-isovaleric acid 1	0.783333333333333	0.0172233245149912
7-palmitoleic acid	2-Ketovaleric acid 1	0.233333333333333	0.551708553791887
7-palmitoleic acid	2-methylfumarate	0.65	0.0665619488536155
7-palmitoleic acid	3,6-Anhydro-D-galactose 4	-0.816666666666667	0.0107694003527337
7-palmitoleic acid	3-Aminoisobutyric acid 2	-0.333333333333333	0.385322971781305
7-palmitoleic acid	3-Cyanoalanine	0.866666666666667	0.00450837742504409
7-palmitoleic acid	3-Hexenedioic acid	0.75	0.025490520282187
7-palmitoleic acid	3-hydroxybenzoic acid	0.616666666666667	0.0857253086419753
7-palmitoleic acid	3-hydroxybutyric acid	-0.3	0.436623677248677
7-palmitoleic acid	3-Hydroxypropionic acid 1	-0.333333333333333	0.385322971781305
7-palmitoleic acid	3-Hydroxypyridine	-0.15	0.708068783068783
7-palmitoleic acid	3-hydroxypyruvate	0.333333333333333	0.385322971781305
7-palmitoleic acid	3-methylcatechol	0.45	0.229817019400353
7-palmitoleic acid	4-Acetylbutyric acid 2	0.166666666666667	0.677744708994709
7-palmitoleic acid	4-aminobutyric acid 1	-0.183333333333333	0.643639770723104
7-palmitoleic acid	4-Hydroxy-6-methyl-2-pyrone	-0.833333333333333	0.00826719576719577
7-palmitoleic acid	4-hydroxybutyrate	-0.466666666666667	0.212522045855379
7-palmitoleic acid	4-Hydroxymandelic acid	-0.333333333333333	0.385322971781305
7-palmitoleic acid	4-hydroxyphenylacetic acid	0.166666666666667	0.677744708994709
7-palmitoleic acid	4-HYDROXYPYRIDINE	-0.433333333333333	0.249917328042328
7-palmitoleic acid	4-Methylbenzyl alcohol	0.8	0.0138282627865961
7-palmitoleic acid	5-aminovaleric acid lactam	-0.05	0.911618165784832
7-palmitoleic acid	5-Methoxytryptamine 1	0.333333333333333	0.385322971781305
7-palmitoleic acid	5'-methylthioadenosine 1	0.583333333333333	0.107997134038801
7-palmitoleic acid	6-phosphogluconic acid	-0.7	0.0432539682539683
7-palmitoleic acid	7,8-Dimethylalloxazine	0.3	0.436623677248677
7-palmitoleic acid	adenosine	0.616666666666667	0.0857253086419753
7-palmitoleic acid	Adenosine 5-monophosphate	0.783333333333333	0.0172233245149912
7-palmitoleic acid	Adrenosterone 1	-0.783333333333333	0.0172233245149912
7-palmitoleic acid	alanine 1	-0.45	0.229817019400353
7-palmitoleic acid	Alizarin	0.833333333333333	0.00826719576719577
7-palmitoleic acid	allose 1	-0.816666666666667	0.0107694003527337
7-palmitoleic acid	Allylmalonic acid	0.583333333333333	0.107997134038801
7-palmitoleic acid	alpha-Aminoadipic acid	0.533333333333333	0.147525352733686
7-palmitoleic acid	alpha-D-glucosamine 1-phosphate	-0.35	0.358581349206349
7-palmitoleic acid	alpha-ketoglutaric acid	0.9	0.00202821869488536
7-palmitoleic acid	alpha-ketoisocaproic acid 1	0.416666666666667	0.269582231040564
7-palmitoleic acid	Aminomalonic acid	-0.383333333333333	0.3125
7-palmitoleic acid	Aminooxyacetic acid	-0.783333333333333	0.0172233245149912
7-palmitoleic acid	Arachidic acid	0.516666666666667	0.161800044091711
7-palmitoleic acid	asparagine 1	0.783333333333333	0.0172233245149912
7-palmitoleic acid	asparagine 4	0.85	0.00607363315696649
7-palmitoleic acid	aspartic acid 1	-0.35	0.358581349206349
7-palmitoleic acid	Atropine	-0.433333333333333	0.249917328042328
7-palmitoleic acid	Behenic acid	-0.5	0.177662037037037
7-palmitoleic acid	beta-Alanine 2	-0.9	0.00202821869488536
7-palmitoleic acid	beta-Glutamic acid 1	0.683333333333333	0.0503196649029982
7-palmitoleic acid	beta-Hydroxymyristic acid	-0.783333333333333	0.0172233245149912
7-palmitoleic acid	beta-Mannosylglycerate 1	0.2	0.613403880070547
7-palmitoleic acid	Bis(2-hydroxypropyl)amine 1	0.05	0.911618165784832
7-palmitoleic acid	butyraldehyde 1	-0.783333333333333	0.0172233245149912
7-palmitoleic acid	canavanine degr prod	-0.6	0.0967978395061728
7-palmitoleic acid	carbamoyl-aspartic acid 2	0.766666666666667	0.0213899911816578
7-palmitoleic acid	Cerotinic acid	0.483333333333333	0.193799603174603
7-palmitoleic acid	Cholestane-3,5,6-triol, (3?5?6?-	-0.6	0.0967978395061728
7-palmitoleic acid	cholesterol	-0.633333333333333	0.0760361552028219
7-palmitoleic acid	cis-gondoic acid	-0.35	0.358581349206349
7-palmitoleic acid	Citraconic acid 3	-0.65	0.0665619488536155
7-palmitoleic acid	citrulline 1	-0.55	0.132776675485009
7-palmitoleic acid	conduritol b epoxide 2	-0.4	0.291192680776014
7-palmitoleic acid	creatine degr	-0.833333333333333	0.00826719576719577
7-palmitoleic acid	cyclohexane-1,2-diol	0.716666666666667	0.0368661816578483
7-palmitoleic acid	cycloleucine 1	0.3	0.436623677248677
7-palmitoleic acid	cycloserine	-0.283333333333333	0.462990520282187
7-palmitoleic acid	Cysteinylglycine 3	0.816666666666667	0.0107694003527337
7-palmitoleic acid	cytidine 1	0.333333333333333	0.385322971781305
7-palmitoleic acid	cytidine-monophosphate 1	-0.75	0.025490520282187
7-palmitoleic acid	D-(glycerol 1-phosphate)	-0.6	0.0967978395061728
7-palmitoleic acid	D-alanyl-D-alanine 2	-0.816666666666667	0.0107694003527337
7-palmitoleic acid	D-Arabitol	-0.833333333333333	0.00826719576719577
7-palmitoleic acid	d-Glucoheptose 2	-0.833333333333333	0.00826719576719577
7-palmitoleic acid	D-Glyceric acid	-0.3	0.436623677248677
7-palmitoleic acid	Digitoxose 2	-0.316666666666667	0.410080467372134
7-palmitoleic acid	Diglycerol 1	-0.633333333333333	0.0760361552028219
7-palmitoleic acid	Dihydroxyacetone	-0.633333333333333	0.0760361552028219
7-palmitoleic acid	Dioctyl phthalate	-0.566666666666667	0.120574294532628
7-palmitoleic acid	Dodecanol	-0.8	0.0138282627865961
7-palmitoleic acid	Erythrose 2	-0.333333333333333	0.385322971781305
7-palmitoleic acid	Ethanolamine	-0.833333333333333	0.00826719576719577
7-palmitoleic acid	flavin adenine degrad product	0.433333333333333	0.249917328042328
7-palmitoleic acid	Fluorene	-0.85	0.00607363315696649
7-palmitoleic acid	fructose 1	0.283333333333333	0.462990520282187
7-palmitoleic acid	Fructose 2,6-biphosphate degr prod 2	-0.433333333333333	0.249917328042328
7-palmitoleic acid	fumaric acid	-0.766666666666667	0.0213899911816578
7-palmitoleic acid	Galactinol 3	0.416666666666667	0.269582231040564
7-palmitoleic acid	Gentiobiose 1	0.466666666666667	0.212522045855379
7-palmitoleic acid	Glucoheptonic acid 1	-0.3	0.436623677248677
7-palmitoleic acid	gluconic acid 1	0.383333333333333	0.3125
7-palmitoleic acid	Gluconic lactone 1	-0.833333333333333	0.00826719576719577
7-palmitoleic acid	Glucosaminic acid	0.75	0.025490520282187
7-palmitoleic acid	glucose 2	-0.833333333333333	0.00826719576719577
7-palmitoleic acid	Glucose-1-phosphate	-0.3	0.436623677248677
7-palmitoleic acid	glucose-6-phosphate 2	-0.316666666666667	0.410080467372134
7-palmitoleic acid	glutamic acid	-0.333333333333333	0.385322971781305
7-palmitoleic acid	glutamine 1	0.316666666666667	0.410080467372134
7-palmitoleic acid	glutaraldehyde 2	0.883333333333333	0.00307539682539683
7-palmitoleic acid	glutathione - H2O	0.783333333333333	0.0172233245149912
7-palmitoleic acid	glycerol	-0.45	0.229817019400353
7-palmitoleic acid	glycine 1	-0.416666666666667	0.269582231040564
7-palmitoleic acid	glycine 2	-0.1	0.809981261022928
7-palmitoleic acid	glycocyamine 3	-0.6	0.0967978395061728
7-palmitoleic acid	glycolic acid	-0.833333333333333	0.00826719576719577
7-palmitoleic acid	Guanidinosuccinic acid 3	-0.783333333333333	0.0172233245149912
7-palmitoleic acid	guanine 1	-0.766666666666667	0.0213899911816578
7-palmitoleic acid	guanosine	0.833333333333333	0.00826719576719577
7-palmitoleic acid	guanosine-5'-monophosphate	-0.466666666666667	0.212522045855379
7-palmitoleic acid	heptadecanoic acid	-0.283333333333333	0.462990520282187
7-palmitoleic acid	Hesperitin 1	0.466666666666667	0.212522045855379
7-palmitoleic acid	hexadecane	0.916666666666667	0.00131172839506173
7-palmitoleic acid	histidine 2	-0.4	0.291192680776014
7-palmitoleic acid	Hydantoin, 5-(4-hydroxybutyl)- 2	-0.65	0.0665619488536155
7-palmitoleic acid	hydrocortisone	-0.683333333333333	0.0503196649029982
7-palmitoleic acid	hydroxylamine	-0.0833333333333333	0.843182319223986
7-palmitoleic acid	hydroxyurea	-0.766666666666667	0.0213899911816578
7-palmitoleic acid	hypoxanthine 1	0.5	0.177662037037037
7-palmitoleic acid	indole-3-acetamide 4	-0.716666666666667	0.0368661816578483
7-palmitoleic acid	inosine	-0.883333333333333	0.00307539682539683
7-palmitoleic acid	inosine 5'-monophosphate	-0.85	0.00607363315696649
7-palmitoleic acid	isocitric acid 2	0.566666666666667	0.120574294532628
7-palmitoleic acid	Isoleucine	-0.3	0.436623677248677
7-palmitoleic acid	Isomaltose 1	-0.833333333333333	0.00826719576719577
7-palmitoleic acid	Lactamide 2	-0.65	0.0665619488536155
7-palmitoleic acid	lactic acid	-0.766666666666667	0.0213899911816578
7-palmitoleic acid	lactose 1	0.616666666666667	0.0857253086419753
7-palmitoleic acid	lactulose 1	-0.433333333333333	0.249917328042328
7-palmitoleic acid	L-Allothreonine 1	0.55	0.132776675485009
7-palmitoleic acid	L-cysteine	-0.35	0.358581349206349
7-palmitoleic acid	L-dopa 2	-0.333333333333333	0.385322971781305
7-palmitoleic acid	leucine	0.0666666666666667	0.880092592592593
7-palmitoleic acid	Leucrose 2	-0.3	0.436623677248677
7-palmitoleic acid	L-glutamic acid	-0.8	0.0138282627865961
7-palmitoleic acid	L-homoserine 1	-0.333333333333333	0.385322971781305
7-palmitoleic acid	Lignoceric acid	0.433333333333333	0.249917328042328
7-palmitoleic acid	linoleic acid	-0.833333333333333	0.00826719576719577
7-palmitoleic acid	Linoleic acid methyl ester	-0.666666666666667	0.0588899911816579
7-palmitoleic acid	lipoic acid	-0.8	0.0138282627865961
7-palmitoleic acid	L-Malic acid	-0.75	0.025490520282187
7-palmitoleic acid	Loganin	-0.316666666666667	0.410080467372134
7-palmitoleic acid	L-Threose 2	0.216666666666667	0.580941358024691
7-palmitoleic acid	lysine	-0.366666666666667	0.336259920634921
7-palmitoleic acid	Lyxose 1	-0.833333333333333	0.00826719576719577
7-palmitoleic acid	Maleamate 1	0.533333333333333	0.147525352733686
7-palmitoleic acid	Maleimide	0.766666666666667	0.0213899911816578
7-palmitoleic acid	malonic acid 1	0.183333333333333	0.643639770723104
7-palmitoleic acid	maltitol	-0.833333333333333	0.00826719576719577
7-palmitoleic acid	maltose	-0.383333333333333	0.3125
7-palmitoleic acid	maltotriose 2	0.866666666666667	0.00450837742504409
7-palmitoleic acid	mannose 2	-0.833333333333333	0.00826719576719577
7-palmitoleic acid	Melatonin 3	0.8	0.0138282627865961
7-palmitoleic acid	melibiose 1	0.983333333333333	4.96031746031746e-05
7-palmitoleic acid	methionine sulfoxide 2	-0.283333333333333	0.462990520282187
7-palmitoleic acid	Methoxamedrine 2	-0.45	0.229817019400353
7-palmitoleic acid	Methyl Palmitoleate	-0.45	0.229817019400353
7-palmitoleic acid	Methyl Phosphate	-0.8	0.0138282627865961
7-palmitoleic acid	Monostearin	-0.383333333333333	0.3125
7-palmitoleic acid	myo-inositol	-0.583333333333333	0.107997134038801
7-palmitoleic acid	Myristic Acid	-0.4	0.291192680776014
7-palmitoleic acid	N(epsilon)-Trimethyllysine	-0.583333333333333	0.107997134038801
7-palmitoleic acid	N-Acetyl-beta-D-mannosamine 4	-0.833333333333333	0.00826719576719577
7-palmitoleic acid	N-alpha-Acetyl-L-ornithine 3	0.366666666666667	0.336259920634921
7-palmitoleic acid	naphthalene	-0.616666666666667	0.0857253086419753
7-palmitoleic acid	N-cyclohexylformamide 1	-0.833333333333333	0.00826719576719577
7-palmitoleic acid	Neohesperidin	-0.233333333333333	0.551708553791887
7-palmitoleic acid	N-epsilon-Acetyl-L-lysine 2	-0.833333333333333	0.00826719576719577
7-palmitoleic acid	N-ethylmaleamic acid 3	0.866666666666667	0.00450837742504409
7-palmitoleic acid	N-formyl-L-methionine 1	0.616666666666667	0.0857253086419753
7-palmitoleic acid	nicotinic acid	-0.833333333333333	0.00826719576719577
7-palmitoleic acid	N-Methyl-DL-alanine	0.666666666666667	0.0588899911816579
7-palmitoleic acid	N-Methyl-L-glutamic acid 2	-0.8	0.0138282627865961
7-palmitoleic acid	N-Oleoyldopamine 1	-0.783333333333333	0.0172233245149912
7-palmitoleic acid	nornicotine	0.833333333333333	0.00826719576719577
7-palmitoleic acid	norvaline	0.0833333333333333	0.843182319223986
7-palmitoleic acid	O-acetylserine 1	0.883333333333333	0.00307539682539683
7-palmitoleic acid	Octadecanol	-0.3	0.436623677248677
7-palmitoleic acid	oleic acid	-0.266666666666667	0.493331128747795
7-palmitoleic acid	O-Phosphorylethanolamine	-0.0833333333333333	0.843182319223986
7-palmitoleic acid	O-Phosphoserine 1	-0.833333333333333	0.00826719576719577
7-palmitoleic acid	ornithine 1	-0.333333333333333	0.385322971781305
7-palmitoleic acid	oxalic acid	-0.85	0.00607363315696649
7-palmitoleic acid	oxamide	-0.35	0.358581349206349
7-palmitoleic acid	oxoproline	0.866666666666667	0.00450837742504409
7-palmitoleic acid	palatinitol 2	-0.6	0.0967978395061728
7-palmitoleic acid	palmitic acid	-0.4	0.291192680776014
7-palmitoleic acid	palmitoleic acid	-0.266666666666667	0.493331128747795
7-palmitoleic acid	pantothenic acid	-0.333333333333333	0.385322971781305
7-palmitoleic acid	p-cresol	-0.816666666666667	0.0107694003527337
7-palmitoleic acid	Pelargonic acid	-0.4	0.291192680776014
7-palmitoleic acid	phenylalanine 1	-0.333333333333333	0.385322971781305
7-palmitoleic acid	phenylethylamine	0.45	0.229817019400353
7-palmitoleic acid	phloroglucinol	-0.833333333333333	0.00826719576719577
7-palmitoleic acid	phosphate	-0.816666666666667	0.0107694003527337
7-palmitoleic acid	Phosphoglycolic acid	-0.35	0.358581349206349
7-palmitoleic acid	Phytol	-0.816666666666667	0.0107694003527337
7-palmitoleic acid	piperine 2	0.916666666666667	0.00131172839506173
7-palmitoleic acid	proline	0.866666666666667	0.00450837742504409
7-palmitoleic acid	prostaglandin A2 1	-0.333333333333333	0.385322971781305
7-palmitoleic acid	Prostaglandin E2 2	-0.833333333333333	0.00826719576719577
7-palmitoleic acid	putrescine 2	-0.833333333333333	0.00826719576719577
7-palmitoleic acid	Pyrrole-2-Carboxylic Acid	-0.233333333333333	0.551708553791887
7-palmitoleic acid	Pyruvic acid	0.866666666666667	0.00450837742504409
7-palmitoleic acid	quinic acid	0.766666666666667	0.0213899911816578
7-palmitoleic acid	raffinose	0.666666666666667	0.0588899911816579
7-palmitoleic acid	ribitol	-0.883333333333333	0.00307539682539683
7-palmitoleic acid	Ribonic acid, gamma-lactone	-0.333333333333333	0.385322971781305
7-palmitoleic acid	ribose	0.833333333333333	0.00826719576719577
7-palmitoleic acid	ribose-5-phosphate 2	0.0166666666666667	0.981569664902998
7-palmitoleic acid	Saccharic acid	-0.766666666666667	0.0213899911816578
7-palmitoleic acid	S-carboxymethylcysteine 2	-0.833333333333333	0.00826719576719577
7-palmitoleic acid	serine 1	-0.333333333333333	0.385322971781305
7-palmitoleic acid	shikimic acid	-0.333333333333333	0.385322971781305
7-palmitoleic acid	Sophorose 1	0.55	0.132776675485009
7-palmitoleic acid	sorbitol	0.85	0.00607363315696649
7-palmitoleic acid	sorbose 1	-0.433333333333333	0.249917328042328
7-palmitoleic acid	spermidine 1	-0.833333333333333	0.00826719576719577
7-palmitoleic acid	stearic acid	-0.3	0.436623677248677
7-palmitoleic acid	succinate semialdehyde 2	0.383333333333333	0.3125
7-palmitoleic acid	succinic acid	-0.3	0.436623677248677
7-palmitoleic acid	sucrose	-0.683333333333333	0.0503196649029982
7-palmitoleic acid	Sucrose-6-Phosphate	-0.0666666666666667	0.880092592592593
7-palmitoleic acid	sulfuric acid	-0.316666666666667	0.410080467372134
7-palmitoleic acid	Tagatose 1	-0.833333333333333	0.00826719576719577
7-palmitoleic acid	Tartronic acid	-0.833333333333333	0.00826719576719577
7-palmitoleic acid	taurine	0.0333333333333333	0.948390652557319
7-palmitoleic acid	Threitol	-0.833333333333333	0.00826719576719577
7-palmitoleic acid	threo-beta-hyrdoxyaspartate 2	-0.416666666666667	0.269582231040564
7-palmitoleic acid	Threonic acid	-0.3	0.436623677248677
7-palmitoleic acid	threonine 1	-0.35	0.358581349206349
7-palmitoleic acid	thymidine 1	-0.333333333333333	0.385322971781305
7-palmitoleic acid	thymine	0.25	0.520634920634921
7-palmitoleic acid	Thymol	-0.816666666666667	0.0107694003527337
7-palmitoleic acid	toluenesulfonic acid	0.816666666666667	0.0107694003527337
7-palmitoleic acid	trehalose	0.433333333333333	0.249917328042328
7-palmitoleic acid	trehalose-6-phosphate	-0.3	0.436623677248677
7-palmitoleic acid	tyrosine 1	-0.366666666666667	0.336259920634921
7-palmitoleic acid	uracil	-0.366666666666667	0.336259920634921
7-palmitoleic acid	uric acid	-0.833333333333333	0.00826719576719577
7-palmitoleic acid	uridine 2	0.75	0.025490520282187
7-palmitoleic acid	Uridine monophosphate	-0.65	0.0665619488536155
7-palmitoleic acid	valine	-0.366666666666667	0.336259920634921
7-palmitoleic acid	xanthine	-0.8	0.0138282627865961
7-palmitoleic acid	xanthosine	-0.85	0.00607363315696649
7-palmitoleic acid	xylitol	-0.316666666666667	0.410080467372134
7-palmitoleic acid	Zymosterol 2	-0.266666666666667	0.493331128747795
heptadecanoate acid	(-)-Dihydrocarveol	-0.5	0.177662037037037
heptadecanoate acid	(S)-Mandelic acid	0.683333333333333	0.0503196649029982
heptadecanoate acid	1,2-Cyclohexanedione 4	-0.733333333333333	0.0311232363315697
heptadecanoate acid	1,2-Didecanoylglycerol	-0.15	0.708068783068783
heptadecanoate acid	1,5-Anhydroglucitol	-0.116666666666667	0.775628306878307
heptadecanoate acid	1-Hexadecanol	-0.4	0.291192680776014
heptadecanoate acid	1-Methylhydantoin 1	-0.166666666666667	0.677744708994709
heptadecanoate acid	1-Monopalmitin	-0.483333333333333	0.193799603174603
heptadecanoate acid	2,2-Dimethylsuccinic Acid	-0.366666666666667	0.336259920634921
heptadecanoate acid	2,4-diaminobutyric acid 2	0.533333333333333	0.147525352733686
heptadecanoate acid	2,6-Diaminopimelic acid 1	-0.533333333333333	0.147525352733686
heptadecanoate acid	2-amino-2-methylpropane-1,3-diol 2	0.65	0.0665619488536155
heptadecanoate acid	2-Butyne-1,4-diol	-0.583333333333333	0.107997134038801
heptadecanoate acid	2-Deoxy-D-galactose 2	-0.316666666666667	0.410080467372134
heptadecanoate acid	2-deoxy-D-glucose 2	0.433333333333333	0.249917328042328
heptadecanoate acid	2-Deoxyerythritol	-0.383333333333333	0.3125
heptadecanoate acid	2'-deoxyguanosine 1	-0.366666666666667	0.336259920634921
heptadecanoate acid	2-hydroxypyridine	-0.45	0.229817019400353
heptadecanoate acid	2-ketobutyric acid 2	-0.316666666666667	0.410080467372134
heptadecanoate acid	2-Ketocaproic acid	-0.333333333333333	0.385322971781305
heptadecanoate acid	2-keto-isovaleric acid 1	0.166666666666667	0.677744708994709
heptadecanoate acid	2-Ketovaleric acid 1	0.0166666666666667	0.981569664902998
heptadecanoate acid	2-methylfumarate	0.0333333333333333	0.948390652557319
heptadecanoate acid	3,6-Anhydro-D-galactose 4	-0.466666666666667	0.212522045855379
heptadecanoate acid	3-Aminoisobutyric acid 2	-0.433333333333333	0.249917328042328
heptadecanoate acid	3-Cyanoalanine	0.383333333333333	0.3125
heptadecanoate acid	3-Hexenedioic acid	0.283333333333333	0.462990520282187
heptadecanoate acid	3-hydroxybenzoic acid	0.166666666666667	0.677744708994709
heptadecanoate acid	3-hydroxybutyric acid	-0.483333333333333	0.193799603174603
heptadecanoate acid	3-Hydroxypropionic acid 1	-0.616666666666667	0.0857253086419753
heptadecanoate acid	3-Hydroxypyridine	0.0166666666666667	0.981569664902998
heptadecanoate acid	3-hydroxypyruvate	0.55	0.132776675485009
heptadecanoate acid	3-methylcatechol	0.6	0.0967978395061728
heptadecanoate acid	4-Acetylbutyric acid 2	0.35	0.358581349206349
heptadecanoate acid	4-aminobutyric acid 1	0.733333333333333	0.0311232363315697
heptadecanoate acid	4-Hydroxy-6-methyl-2-pyrone	-0.316666666666667	0.410080467372134
heptadecanoate acid	4-hydroxybutyrate	-0.266666666666667	0.493331128747795
heptadecanoate acid	4-Hydroxymandelic acid	-0.616666666666667	0.0857253086419753
heptadecanoate acid	4-hydroxyphenylacetic acid	-0.0333333333333333	0.948390652557319
heptadecanoate acid	4-HYDROXYPYRIDINE	0.0666666666666667	0.880092592592593
heptadecanoate acid	4-Methylbenzyl alcohol	0.233333333333333	0.551708553791887
heptadecanoate acid	5-aminovaleric acid lactam	0.733333333333333	0.0311232363315697
heptadecanoate acid	5-Methoxytryptamine 1	-0.0833333333333333	0.843182319223986
heptadecanoate acid	5'-methylthioadenosine 1	0.35	0.358581349206349
heptadecanoate acid	6-phosphogluconic acid	-0.333333333333333	0.385322971781305
heptadecanoate acid	7,8-Dimethylalloxazine	0.5	0.177662037037037
heptadecanoate acid	adenosine	0.3	0.436623677248677
heptadecanoate acid	Adenosine 5-monophosphate	0.233333333333333	0.551708553791887
heptadecanoate acid	Adrenosterone 1	-0.2	0.613403880070547
heptadecanoate acid	alanine 1	-0.5	0.177662037037037
heptadecanoate acid	Alizarin	0.216666666666667	0.580941358024691
heptadecanoate acid	allose 1	-0.4	0.291192680776014
heptadecanoate acid	Allylmalonic acid	0.366666666666667	0.336259920634921
heptadecanoate acid	alpha-Aminoadipic acid	0.333333333333333	0.385322971781305
heptadecanoate acid	alpha-D-glucosamine 1-phosphate	-0.683333333333333	0.0503196649029982
heptadecanoate acid	alpha-ketoglutaric acid	0.3	0.436623677248677
heptadecanoate acid	alpha-ketoisocaproic acid 1	0.716666666666667	0.0368661816578483
heptadecanoate acid	Aminomalonic acid	-0.633333333333333	0.0760361552028219
heptadecanoate acid	Aminooxyacetic acid	-0.116666666666667	0.775628306878307
heptadecanoate acid	Arachidic acid	0.3	0.436623677248677
heptadecanoate acid	asparagine 1	0.233333333333333	0.551708553791887
heptadecanoate acid	asparagine 4	0.4	0.291192680776014
heptadecanoate acid	aspartic acid 1	-0.5	0.177662037037037
heptadecanoate acid	Atropine	-0.766666666666667	0.0213899911816578
heptadecanoate acid	Behenic acid	-0.366666666666667	0.336259920634921
heptadecanoate acid	beta-Alanine 2	-0.55	0.132776675485009
heptadecanoate acid	beta-Glutamic acid 1	0.383333333333333	0.3125
heptadecanoate acid	beta-Hydroxymyristic acid	-0.666666666666667	0.0588899911816579
heptadecanoate acid	beta-Mannosylglycerate 1	-0.183333333333333	0.643639770723104
heptadecanoate acid	Bis(2-hydroxypropyl)amine 1	0.716666666666667	0.0368661816578483
heptadecanoate acid	butyraldehyde 1	-0.116666666666667	0.775628306878307
heptadecanoate acid	canavanine degr prod	-0.733333333333333	0.0311232363315697
heptadecanoate acid	carbamoyl-aspartic acid 2	0.166666666666667	0.677744708994709
heptadecanoate acid	Cerotinic acid	0.5	0.177662037037037
heptadecanoate acid	Cholestane-3,5,6-triol, (3?5?6?-	0	1
heptadecanoate acid	cholesterol	0	1
heptadecanoate acid	cis-gondoic acid	-0.466666666666667	0.212522045855379
heptadecanoate acid	Citraconic acid 3	-0.25	0.520634920634921
heptadecanoate acid	citrulline 1	-0.433333333333333	0.249917328042328
heptadecanoate acid	conduritol b epoxide 2	-0.666666666666667	0.0588899911816579
heptadecanoate acid	creatine degr	-0.316666666666667	0.410080467372134
heptadecanoate acid	cyclohexane-1,2-diol	0.716666666666667	0.0368661816578483
heptadecanoate acid	cycloleucine 1	0.166666666666667	0.677744708994709
heptadecanoate acid	cycloserine	-0.416666666666667	0.269582231040564
heptadecanoate acid	Cysteinylglycine 3	0.266666666666667	0.493331128747795
heptadecanoate acid	cytidine 1	0.55	0.132776675485009
heptadecanoate acid	cytidine-monophosphate 1	-0.233333333333333	0.551708553791887
heptadecanoate acid	D-(glycerol 1-phosphate)	-0.633333333333333	0.0760361552028219
heptadecanoate acid	D-alanyl-D-alanine 2	-0.366666666666667	0.336259920634921
heptadecanoate acid	D-Arabitol	-0.316666666666667	0.410080467372134
heptadecanoate acid	d-Glucoheptose 2	-0.316666666666667	0.410080467372134
heptadecanoate acid	D-Glyceric acid	-0.483333333333333	0.193799603174603
heptadecanoate acid	Digitoxose 2	-0.666666666666667	0.0588899911816579
heptadecanoate acid	Diglycerol 1	-0.533333333333333	0.147525352733686
heptadecanoate acid	Dihydroxyacetone	-0.116666666666667	0.775628306878307
heptadecanoate acid	Dioctyl phthalate	-0.683333333333333	0.0503196649029982
heptadecanoate acid	Dodecanol	-0.333333333333333	0.385322971781305
heptadecanoate acid	Erythrose 2	0.233333333333333	0.551708553791887
heptadecanoate acid	Ethanolamine	-0.316666666666667	0.410080467372134
heptadecanoate acid	flavin adenine degrad product	0.516666666666667	0.161800044091711
heptadecanoate acid	Fluorene	-0.383333333333333	0.3125
heptadecanoate acid	fructose 1	0.5	0.177662037037037
heptadecanoate acid	Fructose 2,6-biphosphate degr prod 2	-0.466666666666667	0.212522045855379
heptadecanoate acid	fumaric acid	-0.383333333333333	0.3125
heptadecanoate acid	Galactinol 3	0.383333333333333	0.3125
heptadecanoate acid	Gentiobiose 1	0.5	0.177662037037037
heptadecanoate acid	Glucoheptonic acid 1	-0.633333333333333	0.0760361552028219
heptadecanoate acid	gluconic acid 1	0.75	0.025490520282187
heptadecanoate acid	Gluconic lactone 1	-0.316666666666667	0.410080467372134
heptadecanoate acid	Glucosaminic acid	0.2	0.613403880070547
heptadecanoate acid	glucose 2	-0.316666666666667	0.410080467372134
heptadecanoate acid	Glucose-1-phosphate	-0.633333333333333	0.0760361552028219
heptadecanoate acid	glucose-6-phosphate 2	-0.666666666666667	0.0588899911816579
heptadecanoate acid	glutamic acid	-0.55	0.132776675485009
heptadecanoate acid	glutamine 1	0.55	0.132776675485009
heptadecanoate acid	glutaraldehyde 2	0.25	0.520634920634921
heptadecanoate acid	glutathione - H2O	0.233333333333333	0.551708553791887
heptadecanoate acid	glycerol	-0.7	0.0432539682539683
heptadecanoate acid	glycine 1	-0.45	0.229817019400353
heptadecanoate acid	glycine 2	-0.633333333333333	0.0760361552028219
heptadecanoate acid	glycocyamine 3	-0.733333333333333	0.0311232363315697
heptadecanoate acid	glycolic acid	-0.316666666666667	0.410080467372134
heptadecanoate acid	Guanidinosuccinic acid 3	-0.116666666666667	0.775628306878307
heptadecanoate acid	guanine 1	-0.2	0.613403880070547
heptadecanoate acid	guanosine	0.25	0.520634920634921
heptadecanoate acid	guanosine-5'-monophosphate	-0.616666666666667	0.0857253086419753
heptadecanoate acid	heptadecanoic acid	-0.416666666666667	0.269582231040564
heptadecanoate acid	Hesperitin 1	0.483333333333333	0.193799603174603
heptadecanoate acid	hexadecane	0.483333333333333	0.193799603174603
heptadecanoate acid	histidine 2	-0.666666666666667	0.0588899911816579
heptadecanoate acid	Hydantoin, 5-(4-hydroxybutyl)- 2	-0.233333333333333	0.551708553791887
heptadecanoate acid	hydrocortisone	-0.266666666666667	0.493331128747795
heptadecanoate acid	hydroxylamine	0.1	0.809981261022928
heptadecanoate acid	hydroxyurea	-0.3	0.436623677248677
heptadecanoate acid	hypoxanthine 1	0.266666666666667	0.493331128747795
heptadecanoate acid	indole-3-acetamide 4	-0.7	0.0432539682539683
heptadecanoate acid	inosine	-0.333333333333333	0.385322971781305
heptadecanoate acid	inosine 5'-monophosphate	-0.216666666666667	0.580941358024691
heptadecanoate acid	isocitric acid 2	0.366666666666667	0.336259920634921
heptadecanoate acid	Isoleucine	-0.483333333333333	0.193799603174603
heptadecanoate acid	Isomaltose 1	-0.316666666666667	0.410080467372134
heptadecanoate acid	Lactamide 2	-0.0666666666666667	0.880092592592593
heptadecanoate acid	lactic acid	-0.166666666666667	0.677744708994709
heptadecanoate acid	lactose 1	0.433333333333333	0.249917328042328
heptadecanoate acid	lactulose 1	-0.15	0.708068783068783
heptadecanoate acid	L-Allothreonine 1	0.4	0.291192680776014
heptadecanoate acid	L-cysteine	-0.5	0.177662037037037
heptadecanoate acid	L-dopa 2	-0.616666666666667	0.0857253086419753
heptadecanoate acid	leucine	-0.3	0.436623677248677
heptadecanoate acid	Leucrose 2	-0.483333333333333	0.193799603174603
heptadecanoate acid	L-glutamic acid	-0.183333333333333	0.643639770723104
heptadecanoate acid	L-homoserine 1	-0.433333333333333	0.249917328042328
heptadecanoate acid	Lignoceric acid	0.35	0.358581349206349
heptadecanoate acid	linoleic acid	-0.316666666666667	0.410080467372134
heptadecanoate acid	Linoleic acid methyl ester	-0.383333333333333	0.3125
heptadecanoate acid	lipoic acid	-0.183333333333333	0.643639770723104
[truncated: 6,156 more rows]
